# Supplementary material
Source: PubMed Central journal article supplement (PMC8138837)
Supplement: supplementary_material_s1_bbaa125.pdf [file supplementary_material_s1_bbaa125.pdf]

# DeepVF: a deep learning-based hybrid framework for identifying virulence factors using the stacking strategy

## Supplementary Material

### Table of Contents

#### 1. Supplementary Tables

Table S1. Detailed information of existing methods for VF prediction.

Table S2. Performance comparison of multiple models for predicting VFs with different CD-HIT thresholds on the 10-fold cross-validation test.

Table S3. Explanation of the seven parameters of XGBoost.

Table S4. Performance comparison of ML baseline models with traditional ML features (without combining with *seqsim*) and *seqsim* for predicting VFs on the 10-fold cross-validation test.

Table S5. Performance comparison of DL baseline models with their optimal features using different dropout rates on the 10-fold cross-validation test.

Table S6. Performance comparison of baseline models with different cut-off thresholds on the 10-fold cross-validation test.

Table S7. Performance comparison of different algorithms to construct the final meta model on the 10-fold cross-validation test.

Table S8. Performance comparison between models the meta model using the prediction label and the prediction score of baseline models based on the 10-fold cross validation test.

Table S9. Detailed contributions of different baseline models to the performance of the ultimate meta XGBoost classifier.

Table S10. Performance comparison of baseline models for VF prediction on the independent test.

Table S11. Performance comparison of DeepVF trained based on VirulentPred's training dataset and VirulentPred on different independent datasets.

Table S12. Summary of the top 100 sequences predicted by DeepVF and the BLAST-based baseline predictor based on three proteomes.

Table S13. Detailed information of DeepVF and the existing toolkits for VF prediction from the user's viewpoint.

## **2. Supplementary Figures**

Fig. S1. Distribution of sequence lengths of proteins in the curated dataset.

Fig. S2. The pipeline of constructing a baseline model based on the training dataset, and the prediction process on the independent dataset.

Fig. S3. Performance comparison of different DL models trained using different sizes of protein sequence segments based on the sequence-to-vector feature encoding method.

Fig. S4. ROC curves of DeepVF, the BLAST-based baseline predictor and three existing state-of-the-art methods for VF prediction on the independent test.

## **3. Supplementary References**

# 1. Supplementary Tables

**Table S1.** Detailed information of existing methods for VF prediction.

| Method                          | Data size (Positive/Negative samples) | Negative sample selection                                                                 | Features                                                                                                          | Models                                    | Ensemble learning strategy used | Web server or software accessibility                                                                        | Origin |
|---------------------------------|---------------------------------------|-------------------------------------------------------------------------------------------|-------------------------------------------------------------------------------------------------------------------|-------------------------------------------|---------------------------------|-------------------------------------------------------------------------------------------------------------|--------|
| SPAAN (predicting the adhesins) | 469/703                               | Bacterial enzymes and other non-virulent proteins                                         | amino acid frequencies, multiplet frequencies, dipeptide frequencies, charge composition, hydrophobic composition | Neural network                            | NO                              | -                                                                                                           | [1]    |
| VirulentPred                    | 1025/1030                             | Bacterial enzymes and other non-virulent proteins                                         | AAC, DPC, higher order dipeptide composition, PSSM, sequence similarity                                           | SVM                                       | YES                             | <a href="http://bioinfo.icgeb.res.in/virulent/">http://bioinfo.icgeb.res.in/virulent/</a>                   | [2]    |
| E_SVM_VF <sup>a</sup>           | 1025/1030                             | Bacterial enzymes and other non-virulent proteins                                         | Amino acid (AA) composition, Weighted AA composition, Five-level grouping composition                             | SVM                                       | YES                             | -                                                                                                           | [3]    |
| Virulent-GO                     | 1025/1030                             | Bacterial enzymes and other non-virulent proteins                                         | GO terms                                                                                                          | SVM, Naïve Bayes, KNN, C4.5 Decision tree | NO                              | -                                                                                                           | [4]    |
| VF_PAAC_EI <sup>a</sup>         | 1025/1030                             | Bacterial enzymes and other non-virulent proteins                                         | 2-Grams, RC, PA, GP, PSSM, AA                                                                                     | SVM                                       | YES                             | -                                                                                                           | [5]    |
| ACCM_VFs <sup>a</sup>           | 803/803*5                             | Random sampling from the VF-contributing proteomes                                        | AAC, PAAC                                                                                                         | STRING network, BLAST, NNA classifier     | NO                              | -                                                                                                           | [6]    |
| VF_KEGG <sup>a</sup>            | 514/514*5                             | Random sampling from the VF-contributing proteomes                                        | KEGG pathway                                                                                                      | RF                                        | NO                              | -                                                                                                           | [7]    |
| MP3                             | 1708/5815                             | Proteins deemed 'essential' for survival                                                  | AAC, DPC                                                                                                          | SVM, HMM                                  | NO                              | <a href="http://metagenomics.iiserb.ac.in/mp3/index.php">http://metagenomics.iiserb.ac.in/mp3/index.php</a> | [8]    |
| PBVF <sup>a</sup>               | 3891/10025                            | A novel strategy for selecting negatives that relies on protein function annotation data. | DPC, sequence similarity                                                                                          | SVM, RF, BLAST                            | NO                              | -                                                                                                           | [9]    |

<sup>a</sup>As the names of these methods were not explicitly provided in the original work, here we named them according to the titles of their published papers.

**Table S2.** Performance comparison of multiple models for predicting VFs with different CD-HIT thresholds on the 10-fold cross-validation test.

| Model <sup>a</sup> | Threshold | SN                 | SP                 | ACC                | F-value            | MCC                |
|--------------------|-----------|--------------------|--------------------|--------------------|--------------------|--------------------|
| RF-AAC             | 0.3       | 0.641±0.029        | 0.699±0.011        | 0.670±0.017        | 0.660±0.019        | 0.341±0.033        |
|                    | 0.4       | 0.655±0.025        | 0.710±0.021        | 0.682±0.014        | 0.673±0.016        | 0.366±0.027        |
|                    | 0.5       | 0.653±0.016        | 0.726±0.026        | 0.689±0.009        | 0.678±0.011        | 0.380±0.019        |
|                    | 0.6       | 0.670±0.020        | 0.738±0.015        | 0.704±0.013        | 0.693±0.016        | 0.408±0.025        |
|                    | 0.7       | 0.663±0.031        | 0.751±0.013        | 0.707±0.017        | 0.693±0.019        | 0.416±0.032        |
|                    | 0.8       | 0.667±0.013        | 0.755±0.025        | 0.711±0.015        | 0.698±0.016        | 0.424±0.030        |
|                    | 0.9       | <b>0.671±0.026</b> | <b>0.761±0.018</b> | <b>0.716±0.016</b> | <b>0.702±0.016</b> | <b>0.433±0.031</b> |
| SVM-AAC            | 0.3       | 0.663±0.037        | 0.700±0.016        | 0.681±0.022        | 0.675±0.026        | 0.363±0.044        |
|                    | 0.4       | 0.685±0.034        | 0.710±0.027        | 0.697±0.016        | 0.693±0.018        | 0.396±0.032        |
|                    | 0.5       | 0.687±0.016        | 0.717±0.024        | 0.702±0.013        | 0.697±0.017        | 0.403±0.025        |
|                    | 0.6       | 0.706±0.018        | 0.729±0.024        | 0.718±0.016        | 0.714±0.019        | 0.435±0.031        |
|                    | 0.7       | 0.716±0.019        | 0.741±0.012        | 0.728±0.012        | 0.725±0.010        | 0.456±0.023        |
|                    | 0.8       | 0.714±0.011        | 0.740±0.016        | 0.727±0.010        | 0.723±0.015        | 0.453±0.020        |
|                    | 0.9       | <b>0.723±0.025</b> | <b>0.752±0.017</b> | <b>0.737±0.011</b> | <b>0.733±0.014</b> | <b>0.475±0.022</b> |
| XGBoost-AAC        | 0.3       | 0.651±0.022        | 0.672±0.016        | 0.661±0.009        | 0.657±0.012        | 0.323±0.019        |
|                    | 0.4       | 0.663±0.027        | 0.704±0.026        | 0.683±0.013        | 0.676±0.018        | 0.368±0.026        |
|                    | 0.5       | 0.666±0.021        | 0.702±0.025        | 0.684±0.014        | 0.678±0.019        | 0.368±0.029        |
|                    | 0.6       | 0.667±0.019        | 0.721±0.017        | 0.694±0.014        | 0.685±0.020        | 0.388±0.028        |
|                    | 0.7       | 0.673±0.024        | 0.737±0.018        | 0.705±0.019        | 0.695±0.018        | 0.411±0.036        |
|                    | 0.8       | 0.663±0.011        | 0.737±0.029        | 0.700±0.016        | 0.688±0.013        | 0.401±0.032        |
|                    | 0.9       | <b>0.676±0.029</b> | <b>0.747±0.018</b> | <b>0.711±0.016</b> | <b>0.700±0.018</b> | <b>0.424±0.031</b> |
| MLP-AAC            | 0.3       | 0.571±0.082        | 0.790±0.066        | 0.681±0.015        | 0.639±0.043        | 0.374±0.025        |
|                    | 0.4       | 0.667±0.064        | 0.711±0.069        | 0.690±0.010        | 0.682±0.027        | 0.381±0.021        |
|                    | 0.5       | 0.625±0.066        | 0.765±0.069        | 0.694±0.009        | 0.670±0.023        | 0.397±0.020        |
|                    | 0.6       | 0.637±0.058        | 0.770±0.046        | 0.705±0.014        | 0.682±0.033        | 0.412±0.025        |
|                    | 0.7       | 0.624±0.035        | <b>0.795±0.046</b> | 0.711±0.013        | 0.683±0.018        | 0.427±0.029        |
|                    | 0.8       | 0.652±0.051        | 0.783±0.054        | <b>0.718±0.009</b> | 0.697±0.021        | <b>0.441±0.020</b> |
|                    | 0.9       | <b>0.681±0.072</b> | 0.747±0.091        | 0.716±0.015        | <b>0.704±0.026</b> | 0.434±0.033        |
| CNN-L500           | 0.3       | 0.647±0.082        | 0.694±0.076        | 0.670±0.012        | 0.660±0.032        | 0.346±0.022        |
|                    | 0.4       | 0.616±0.057        | 0.739±0.059        | 0.677±0.012        | 0.655±0.020        | 0.360±0.025        |
|                    | 0.5       | 0.638±0.055        | 0.750±0.050        | 0.695±0.008        | 0.675±0.028        | 0.392±0.017        |

|           |     |                    |                    |                    |                    |                    |
|-----------|-----|--------------------|--------------------|--------------------|--------------------|--------------------|
|           | 0.6 | 0.661±0.056        | 0.747±0.048        | 0.704±0.009        | 0.690±0.027        | 0.411±0.019        |
|           | 0.7 | 0.687±0.066        | 0.745±0.060        | 0.717±0.011        | 0.706±0.026        | 0.436±0.022        |
|           | 0.8 | 0.688±0.044        | 0.756±0.037        | 0.722±0.006        | 0.712±0.022        | 0.446±0.013        |
|           | 0.9 | <b>0.688±0.055</b> | <b>0.774±0.050</b> | <b>0.731±0.010</b> | <b>0.718±0.023</b> | <b>0.465±0.020</b> |
|           | 0.3 | 0.567±0.033        | 0.754±0.016        | 0.660±0.014        | 0.625±0.021        | 0.327±0.025        |
|           | 0.4 | 0.568±0.057        | 0.767±0.045        | 0.668±0.012        | 0.630±0.030        | 0.343±0.021        |
|           | 0.5 | 0.608±0.040        | 0.745±0.044        | 0.677±0.008        | 0.652±0.020        | 0.358±0.016        |
| LSTM-L500 | 0.6 | 0.612±0.050        | 0.767±0.036        | 0.690±0.014        | 0.662±0.032        | 0.384±0.027        |
|           | 0.7 | <b>0.647±0.053</b> | 0.742±0.053        | 0.694±0.013        | 0.678±0.020        | 0.392±0.029        |
|           | 0.8 | 0.641±0.048        | 0.748±0.050        | 0.696±0.010        | 0.677±0.023        | 0.393±0.022        |
|           | 0.9 | 0.636±0.079        | <b>0.772±0.065</b> | <b>0.705±0.012</b> | <b>0.680±0.037</b> | <b>0.415±0.021</b> |
|           | 0.3 | 0.611±0.038        | 0.748±0.041        | 0.680±0.012        | 0.656±0.019        | 0.364±0.025        |
|           | 0.4 | <b>0.632±0.048</b> | 0.736±0.043        | 0.685±0.016        | 0.667±0.028        | 0.372±0.033        |
|           | 0.5 | 0.616±0.029        | 0.765±0.029        | 0.691±0.011        | 0.665±0.022        | 0.385±0.025        |
| DNN-L500  | 0.6 | 0.607±0.039        | <b>0.792±0.037</b> | 0.699±0.010        | 0.668±0.024        | 0.406±0.024        |
|           | 0.7 | 0.623±0.036        | 0.774±0.041        | 0.699±0.013        | 0.674±0.020        | 0.403±0.026        |
|           | 0.8 | 0.615±0.048        | 0.784±0.047        | 0.701±0.012        | 0.672±0.027        | 0.407±0.024        |
|           | 0.9 | 0.622±0.029        | 0.785±0.036        | <b>0.704±0.013</b> | <b>0.677±0.017</b> | <b>0.413±0.027</b> |

*Note:* For ML, we used the simplest feature AAC (without combining with *seqsim*) to train multiple ML models with different CD-HIT thresholds. For DL, we used the L-500 to train multiple DL models with different thresholds of CD-HIT as the length of majority of sequences in the curated dataset were less than 500 (**Fig. S1**). <sup>a</sup>Model are denoted as model\_feature. For example, RF\_AAC means that the model was trained based on RF with AAC features. Values are expressed as mean±standard deviation. The best performance value for each metric across different CD-HIT thresholds within each model is highlighted in bold.

**Table S3.** Explanation of the seven parameters of XGBoost.

| <b>Parameters</b>       | <b>Description<sup>a</sup></b>                     | <b>Parameter tuning range</b> |
|-------------------------|----------------------------------------------------|-------------------------------|
| <i>max_depth</i>        | max depth of the tree                              | [4,8], step: 1                |
| <i>eta</i>              | step size shrinkage                                | [0.01, 0.03], step: random    |
| <i>gamma</i>            | minimum loss reduction                             | [0, 0.2], step: random        |
| <i>subsample</i>        | subsample ratio of the training instances          | [0.6, 0.9], step: random      |
| <i>colsample_bytree</i> | subsampling ratio of columns                       | [0.5, 0.8], step: random      |
| <i>min_child_weight</i> | minimum sum of instance weight                     | [1, 40], step: 1              |
| <i>max_delta_step</i>   | maximum delta step we allow each leaf output to be | [1,10], step: 1               |

Note: <sup>a</sup>The description of the above parameters comes from the official XGBoost document (<https://xgboost.readthedocs.io/en/latest/>).

**Table S4.** Performance comparison of ML baseline models with traditional ML features (without combining with *seqsim*) and *seqsim* for predicting VFs on the 10-fold cross-validation test.

| Algorithm | Encoding         | SN                 | SP                 | ACC                | F-value            | MCC                |
|-----------|------------------|--------------------|--------------------|--------------------|--------------------|--------------------|
| RF        | AAC              | 0.643±0.019        | 0.694±0.028        | 0.668±0.017        | 0.659±0.015        | 0.337±0.033        |
|           | DPC              | 0.599±0.029        | 0.739±0.025        | 0.669±0.020        | 0.644±0.022        | 0.341±0.040        |
|           | DDE              | 0.610±0.036        | 0.720±0.024        | 0.665±0.022        | 0.645±0.027        | 0.331±0.044        |
|           | PAAC             | 0.641±0.021        | 0.698±0.025        | 0.669±0.017        | 0.660±0.017        | 0.339±0.034        |
|           | QSO              | 0.641±0.022        | 0.717±0.024        | 0.679±0.014        | 0.666±0.015        | 0.359±0.029        |
|           | PSSM-composition | 0.660±0.022        | 0.830±0.024        | 0.745±0.015        | 0.721±0.017        | 0.498±0.031        |
|           | S-FPSSM          | 0.661±0.022        | 0.816±0.021        | 0.739±0.017        | 0.717±0.018        | 0.484±0.033        |
|           | RPM-PSSM         | 0.652±0.020        | <b>0.833±0.024</b> | 0.743±0.015        | 0.717±0.016        | 0.493±0.030        |
|           | seqsim           | <b>0.824±0.017</b> | 0.751±0.020        | <b>0.787±0.011</b> | <b>0.795±0.012</b> | <b>0.576±0.022</b> |
| SVM       | AAC              | 0.651±0.022        | 0.710±0.025        | 0.680±0.016        | 0.671±0.018        | 0.362±0.033        |
|           | DPC              | 0.626±0.021        | 0.695±0.027        | 0.660±0.017        | 0.648±0.017        | 0.321±0.035        |
|           | DDE              | 0.647±0.026        | 0.683±0.029        | 0.665±0.020        | 0.658±0.020        | 0.330±0.041        |
|           | PAAC             | 0.657±0.017        | 0.704±0.026        | 0.680±0.016        | 0.672±0.018        | 0.361±0.033        |
|           | QSO              | 0.653±0.022        | 0.708±0.029        | 0.681±0.016        | 0.672±0.014        | 0.362±0.032        |
|           | PSSM-composition | 0.695±0.034        | <b>0.846±0.022</b> | 0.770±0.021        | 0.751±0.025        | 0.547±0.040        |
|           | S-FPSSM          | 0.718±0.026        | 0.783±0.023        | 0.750±0.019        | 0.742±0.021        | 0.502±0.038        |
|           | RPM-PSSM         | 0.692±0.033        | 0.819±0.026        | 0.756±0.019        | 0.739±0.023        | 0.516±0.038        |
|           | seqsim           | <b>0.859±0.022</b> | 0.737±0.025        | <b>0.798±0.016</b> | <b>0.810±0.017</b> | <b>0.601±0.030</b> |
| XGBoost   | AAC              | 0.647±0.020        | 0.678±0.029        | 0.662±0.017        | 0.657±0.015        | 0.325±0.033        |
|           | DPC              | 0.631±0.024        | 0.701±0.026        | 0.666±0.017        | 0.654±0.019        | 0.333±0.034        |
|           | DDE              | 0.631±0.025        | 0.699±0.026        | 0.665±0.017        | 0.653±0.020        | 0.331±0.033        |
|           | PAAC             | 0.646±0.018        | 0.680±0.027        | 0.663±0.015        | 0.657±0.014        | 0.327±0.030        |
|           | QSO              | 0.651±0.021        | 0.702±0.027        | 0.676±0.018        | 0.668±0.017        | 0.353±0.035        |
|           | PSSM-composition | 0.715±0.025        | <b>0.810±0.024</b> | 0.762±0.016        | 0.751±0.017        | 0.528±0.032        |
|           | S-FPSSM          | 0.700±0.025        | 0.801±0.025        | 0.750±0.018        | 0.737±0.019        | 0.504±0.036        |
|           | RPM-PSSM         | 0.711±0.025        | 0.793±0.024        | 0.752±0.016        | 0.741±0.017        | 0.506±0.031        |
|           | seqsim           | <b>0.825±0.019</b> | 0.761±0.026        | <b>0.793±0.017</b> | <b>0.799±0.019</b> | <b>0.587±0.033</b> |
| MLP       | AAC              | 0.634±0.082        | 0.711±0.092        | 0.673±0.017        | 0.658±0.032        | 0.351±0.034        |
|           | DPC              | 0.615±0.079        | 0.734±0.082        | 0.675±0.015        | 0.652±0.034        | 0.356±0.031        |
|           | DDE              | 0.614±0.074        | 0.700±0.068        | 0.657±0.016        | 0.639±0.036        | 0.318±0.033        |
|           | PAAC             | 0.625±0.093        | 0.712±0.092        | 0.669±0.017        | 0.651±0.039        | 0.344±0.033        |
|           | QSO              | 0.607±0.079        | 0.740±0.071        | 0.674±0.016        | 0.648±0.039        | 0.353±0.031        |

---

|                  |                    |                    |                    |                    |                    |
|------------------|--------------------|--------------------|--------------------|--------------------|--------------------|
| PSSM-composition | 0.746±0.041        | 0.809±0.040        | 0.778±0.015        | 0.770±0.018        | 0.557±0.030        |
| S-FPSSM          | 0.700±0.062        | 0.821±0.048        | 0.761±0.015        | 0.744±0.027        | 0.529±0.028        |
| RPM-PSSM         | 0.718±0.047        | <b>0.824±0.037</b> | 0.771±0.017        | 0.758±0.023        | 0.547±0.032        |
| seqsim           | <b>0.856±0.031</b> | 0.738±0.034        | <b>0.797±0.012</b> | <b>0.808±0.014</b> | <b>0.600±0.025</b> |

---

*Note:* Values are expressed as mean±standard deviation. The best performance value for each metric across different encoding methods within each algorithm is highlighted in bold.



**Table S5.** Performance comparison of DL baseline models with their optimal features using different dropout rates on the 10-fold cross-validation test.

| Model <sup>a</sup> | Dropout rate | SN                 | SP                 | ACC                | F-value            | MCC                |
|--------------------|--------------|--------------------|--------------------|--------------------|--------------------|--------------------|
| CNN-L900           | 0.01         | 0.598±0.087        | 0.724±0.084        | <b>0.661±0.017</b> | 0.635±0.042        | <b>0.329±0.032</b> |
|                    | 0.05         | 0.609±0.057        | 0.711±0.053        | 0.660±0.015        | 0.641±0.027        | 0.324±0.029        |
|                    | 0.10         | 0.585±0.122        | 0.728±0.111        | 0.658±0.015        | 0.624±0.064        | 0.325±0.029        |
|                    | 0.15         | 0.608±0.057        | 0.709±0.045        | 0.658±0.016        | 0.639±0.029        | 0.320±0.031        |
|                    | 0.20         | <b>0.620±0.097</b> | 0.696±0.101        | 0.658±0.012        | <b>0.642±0.039</b> | 0.322±0.024        |
|                    | 0.25         | 0.578±0.078        | <b>0.738±0.068</b> | 0.658±0.014        | 0.625±0.042        | 0.323±0.026        |
|                    | 0.30         | 0.585±0.035        | 0.731±0.037        | 0.659±0.013        | 0.631±0.022        | 0.320±0.027        |
| LSTM-L1000         | 0.01         | 0.560±0.102        | 0.748±0.093        | <b>0.654±0.028</b> | 0.613±0.062        | <b>0.318±0.051</b> |
|                    | 0.05         | 0.544±0.115        | 0.746±0.103        | 0.646±0.017        | 0.599±0.064        | 0.303±0.029        |
|                    | 0.10         | 0.487±0.091        | <b>0.802±0.056</b> | 0.645±0.023        | 0.573±0.064        | 0.307±0.037        |
|                    | 0.15         | 0.516±0.136        | 0.773±0.094        | 0.645±0.027        | 0.583±0.082        | 0.305±0.041        |
|                    | 0.20         | 0.545±0.107        | 0.747±0.071        | 0.646±0.025        | 0.601±0.064        | 0.302±0.047        |
|                    | 0.25         | <b>0.571±0.100</b> | 0.739±0.062        | <b>0.654±0.030</b> | <b>0.618±0.070</b> | 0.316±0.059        |
|                    | 0.30         | 0.540±0.073        | 0.759±0.077        | 0.649±0.014        | 0.603±0.032        | 0.309±0.028        |
| DNN-L500           | 0.01         | <b>0.620±0.054</b> | 0.730±0.050        | <b>0.675±0.019</b> | <b>0.655±0.027</b> | 0.353±0.036        |
|                    | 0.05         | 0.612±0.069        | 0.729±0.057        | 0.670±0.014        | 0.648±0.033        | 0.345±0.024        |
|                    | 0.10         | 0.603±0.045        | 0.741±0.036        | 0.672±0.013        | 0.647±0.021        | 0.348±0.021        |
|                    | 0.15         | 0.596±0.077        | 0.751±0.070        | 0.673±0.009        | 0.644±0.034        | <b>0.354±0.013</b> |
|                    | 0.20         | 0.610±0.027        | 0.732±0.026        | 0.671±0.011        | 0.649±0.013        | 0.344±0.020        |
|                    | 0.25         | 0.584±0.064        | <b>0.756±0.050</b> | 0.670±0.013        | 0.637±0.032        | 0.347±0.022        |
|                    | 0.30         | 0.613±0.056        | 0.736±0.053        | 0.674±0.011        | 0.652±0.023        | <b>0.354±0.021</b> |

*Note:* Values are expressed as mean±standard deviation. The best performance value for each metric across different dropout rates within each algorithm is highlighted in bold.

**Table S6.** Performance comparison of baseline models with different cut-off thresholds on the 10-fold cross-validation test.

| Threshold        | Model   | Encoding         | SN          | SP          | ACC         | F-value     | MCC         |
|------------------|---------|------------------|-------------|-------------|-------------|-------------|-------------|
| 0.3              | RF      | AAC              | 0.924±0.013 | 0.631±0.031 | 0.777±0.017 | 0.806±0.015 | 0.581±0.029 |
|                  |         | DPC              | 0.986±0.011 | 0.154±0.099 | 0.570±0.047 | 0.697±0.024 | 0.244±0.086 |
|                  |         | DDE              | 0.974±0.018 | 0.274±0.130 | 0.624±0.059 | 0.723±0.031 | 0.345±0.093 |
|                  |         | PAAC             | 0.925±0.014 | 0.628±0.038 | 0.777±0.020 | 0.806±0.017 | 0.580±0.034 |
|                  |         | QSO              | 0.938±0.014 | 0.524±0.059 | 0.731±0.028 | 0.777±0.020 | 0.507±0.043 |
|                  |         | PSSM-composition | 0.947±0.011 | 0.459±0.073 | 0.703±0.035 | 0.762±0.023 | 0.465±0.055 |
|                  |         | S-FPSSM          | 0.956±0.010 | 0.434±0.035 | 0.695±0.019 | 0.758±0.015 | 0.458±0.031 |
|                  |         | RPM-PSSM         | 0.964±0.013 | 0.323±0.088 | 0.644±0.041 | 0.731±0.023 | 0.373±0.065 |
|                  | SVM     | AAC              | 0.916±0.014 | 0.567±0.032 | 0.742±0.018 | 0.780±0.016 | 0.516±0.032 |
|                  |         | DPC              | 0.923±0.016 | 0.417±0.038 | 0.670±0.021 | 0.737±0.016 | 0.394±0.039 |
|                  |         | DDE              | 0.915±0.017 | 0.435±0.031 | 0.675±0.018 | 0.738±0.015 | 0.399±0.032 |
|                  |         | PAAC             | 0.918±0.015 | 0.552±0.035 | 0.735±0.020 | 0.776±0.017 | 0.505±0.035 |
|                  |         | QSO              | 0.923±0.013 | 0.495±0.032 | 0.709±0.018 | 0.760±0.015 | 0.463±0.032 |
|                  |         | PSSM-composition | 0.892±0.023 | 0.652±0.025 | 0.772±0.017 | 0.796±0.016 | 0.560±0.035 |
|                  |         | S-FPSSM          | 0.905±0.021 | 0.542±0.054 | 0.723±0.027 | 0.766±0.020 | 0.480±0.047 |
|                  |         | RPM-PSSM         | 0.890±0.017 | 0.582±0.030 | 0.736±0.018 | 0.771±0.016 | 0.496±0.034 |
|                  | XGBoost | AAC              | 0.921±0.014 | 0.658±0.026 | 0.789±0.014 | 0.814±0.013 | 0.600±0.024 |
|                  |         | DPC              | 0.908±0.015 | 0.677±0.023 | 0.793±0.014 | 0.814±0.015 | 0.601±0.027 |
|                  |         | DDE              | 0.906±0.017 | 0.693±0.024 | 0.800±0.015 | 0.819±0.015 | 0.614±0.028 |
|                  |         | PAAC             | 0.913±0.013 | 0.682±0.026 | 0.797±0.016 | 0.818±0.015 | 0.611±0.029 |
|                  |         | QSO              | 0.919±0.014 | 0.675±0.037 | 0.797±0.018 | 0.819±0.015 | 0.614±0.030 |
|                  |         | PSSM-composition | 0.890±0.017 | 0.800±0.024 | 0.845±0.012 | 0.852±0.012 | 0.694±0.023 |
|                  |         | S-FPSSM          | 0.903±0.018 | 0.764±0.029 | 0.833±0.015 | 0.844±0.014 | 0.673±0.028 |
|                  |         | RPM-PSSM         | 0.900±0.014 | 0.763±0.020 | 0.832±0.012 | 0.842±0.012 | 0.670±0.023 |
|                  | MLP     | AAC              | 0.915±0.028 | 0.602±0.116 | 0.759±0.048 | 0.793±0.027 | 0.545±0.084 |
|                  |         | DPC              | 0.909±0.025 | 0.637±0.099 | 0.773±0.040 | 0.801±0.022 | 0.568±0.069 |
|                  |         | DDE              | 0.865±0.042 | 0.697±0.089 | 0.781±0.030 | 0.798±0.020 | 0.574±0.050 |
|                  |         | PAAC             | 0.916±0.029 | 0.601±0.121 | 0.758±0.051 | 0.793±0.028 | 0.545±0.085 |
| QSO              |         | 0.901±0.026      | 0.657±0.088 | 0.779±0.037 | 0.803±0.023 | 0.576±0.057 |             |
| PSSM-composition |         | 0.875±0.030      | 0.772±0.073 | 0.824±0.025 | 0.833±0.017 | 0.654±0.042 |             |
| S-FPSSM          |         | 0.859±0.039      | 0.762±0.073 | 0.811±0.025 | 0.820±0.019 | 0.627±0.045 |             |
| RPM-PSSM         |         | 0.884±0.029      | 0.746±0.075 | 0.815±0.028 | 0.828±0.018 | 0.639±0.045 |             |

|     |      |       |                   |                   |                   |                   |                   |
|-----|------|-------|-------------------|-------------------|-------------------|-------------------|-------------------|
|     |      | L100  | $0.856 \pm 0.118$ | $0.268 \pm 0.176$ | $0.562 \pm 0.035$ | $0.660 \pm 0.024$ | $0.160 \pm 0.053$ |
|     |      | L200  | $0.843 \pm 0.105$ | $0.326 \pm 0.163$ | $0.585 \pm 0.033$ | $0.669 \pm 0.020$ | $0.206 \pm 0.046$ |
|     |      | L300  | $0.787 \pm 0.115$ | $0.426 \pm 0.180$ | $0.607 \pm 0.036$ | $0.665 \pm 0.022$ | $0.237 \pm 0.051$ |
|     |      | L400  | $0.806 \pm 0.104$ | $0.408 \pm 0.171$ | $0.607 \pm 0.037$ | $0.671 \pm 0.021$ | $0.236 \pm 0.067$ |
|     |      | L500  | $0.828 \pm 0.093$ | $0.381 \pm 0.170$ | $0.604 \pm 0.044$ | $0.676 \pm 0.017$ | $0.236 \pm 0.070$ |
|     | CNN  | L600  | $0.809 \pm 0.101$ | $0.403 \pm 0.169$ | $0.607 \pm 0.039$ | $0.672 \pm 0.021$ | $0.237 \pm 0.064$ |
|     |      | L700  | $0.818 \pm 0.101$ | $0.383 \pm 0.173$ | $0.600 \pm 0.043$ | $0.671 \pm 0.017$ | $0.227 \pm 0.067$ |
|     |      | L800  | $0.811 \pm 0.099$ | $0.404 \pm 0.166$ | $0.607 \pm 0.039$ | $0.673 \pm 0.019$ | $0.239 \pm 0.062$ |
|     |      | L900  | $0.837 \pm 0.100$ | $0.363 \pm 0.167$ | $0.600 \pm 0.038$ | $0.676 \pm 0.020$ | $0.231 \pm 0.069$ |
|     |      | L1000 | $0.819 \pm 0.106$ | $0.386 \pm 0.170$ | $0.603 \pm 0.038$ | $0.672 \pm 0.022$ | $0.232 \pm 0.063$ |
|     |      | L100  | $0.930 \pm 0.069$ | $0.147 \pm 0.117$ | $0.538 \pm 0.030$ | $0.668 \pm 0.015$ | $0.125 \pm 0.050$ |
|     |      | L200  | $0.916 \pm 0.075$ | $0.187 \pm 0.129$ | $0.552 \pm 0.029$ | $0.671 \pm 0.015$ | $0.152 \pm 0.050$ |
|     |      | L300  | $0.929 \pm 0.074$ | $0.149 \pm 0.147$ | $0.539 \pm 0.039$ | $0.668 \pm 0.014$ | $0.116 \pm 0.077$ |
|     |      | L400  | $0.939 \pm 0.067$ | $0.118 \pm 0.125$ | $0.529 \pm 0.033$ | $0.666 \pm 0.014$ | $0.100 \pm 0.057$ |
|     | LSTM | L500  | $0.874 \pm 0.113$ | $0.226 \pm 0.198$ | $0.550 \pm 0.046$ | $0.659 \pm 0.019$ | $0.126 \pm 0.089$ |
|     |      | L600  | $0.935 \pm 0.082$ | $0.111 \pm 0.154$ | $0.523 \pm 0.042$ | $0.662 \pm 0.017$ | $0.064 \pm 0.087$ |
|     |      | L700  | $0.933 \pm 0.103$ | $0.105 \pm 0.189$ | $0.518 \pm 0.046$ | $0.659 \pm 0.015$ | $0.043 \pm 0.097$ |
|     |      | L800  | $0.967 \pm 0.063$ | $0.054 \pm 0.117$ | $0.511 \pm 0.031$ | $0.664 \pm 0.014$ | $0.033 \pm 0.073$ |
|     |      | L900  | $0.965 \pm 0.074$ | $0.066 \pm 0.147$ | $0.516 \pm 0.040$ | $0.666 \pm 0.012$ | $0.051 \pm 0.083$ |
|     |      | L1000 | $0.956 \pm 0.093$ | $0.086 \pm 0.169$ | $0.521 \pm 0.041$ | $0.666 \pm 0.014$ | $0.066 \pm 0.089$ |
|     |      | L100  | $0.959 \pm 0.027$ | $0.110 \pm 0.054$ | $0.534 \pm 0.019$ | $0.673 \pm 0.011$ | $0.129 \pm 0.038$ |
|     |      | L200  | $0.937 \pm 0.032$ | $0.167 \pm 0.074$ | $0.553 \pm 0.025$ | $0.677 \pm 0.015$ | $0.162 \pm 0.054$ |
|     |      | L300  | $0.944 \pm 0.027$ | $0.173 \pm 0.066$ | $0.559 \pm 0.025$ | $0.681 \pm 0.014$ | $0.182 \pm 0.050$ |
|     |      | L400  | $0.937 \pm 0.034$ | $0.182 \pm 0.081$ | $0.560 \pm 0.026$ | $0.680 \pm 0.013$ | $0.180 \pm 0.048$ |
|     | DNN  | L500  | $0.941 \pm 0.029$ | $0.172 \pm 0.066$ | $0.556 \pm 0.026$ | $0.680 \pm 0.014$ | $0.177 \pm 0.041$ |
|     |      | L600  | $0.944 \pm 0.029$ | $0.169 \pm 0.064$ | $0.557 \pm 0.022$ | $0.681 \pm 0.012$ | $0.180 \pm 0.041$ |
|     |      | L700  | $0.943 \pm 0.033$ | $0.167 \pm 0.069$ | $0.555 \pm 0.022$ | $0.680 \pm 0.012$ | $0.176 \pm 0.036$ |
|     |      | L800  | $0.947 \pm 0.031$ | $0.154 \pm 0.066$ | $0.551 \pm 0.024$ | $0.678 \pm 0.014$ | $0.167 \pm 0.038$ |
|     |      | L900  | $0.951 \pm 0.026$ | $0.150 \pm 0.055$ | $0.551 \pm 0.020$ | $0.679 \pm 0.013$ | $0.170 \pm 0.035$ |
|     |      | L1000 | $0.948 \pm 0.039$ | $0.151 \pm 0.074$ | $0.550 \pm 0.023$ | $0.678 \pm 0.014$ | $0.165 \pm 0.040$ |
| 0.4 | RF   | AAC   | $0.888 \pm 0.016$ | $0.735 \pm 0.025$ | $0.812 \pm 0.016$ | $0.825 \pm 0.016$ | $0.631 \pm 0.031$ |
|     |      | DPC   | $0.923 \pm 0.018$ | $0.554 \pm 0.084$ | $0.739 \pm 0.037$ | $0.780 \pm 0.025$ | $0.514 \pm 0.059$ |
|     |      | DDE   | $0.913 \pm 0.018$ | $0.595 \pm 0.047$ | $0.754 \pm 0.025$ | $0.788 \pm 0.020$ | $0.536 \pm 0.044$ |
|     |      | PAAC  | $0.890 \pm 0.015$ | $0.735 \pm 0.026$ | $0.813 \pm 0.016$ | $0.826 \pm 0.016$ | $0.633 \pm 0.030$ |

|         |                  |                   |                   |                   |                   |                   |
|---------|------------------|-------------------|-------------------|-------------------|-------------------|-------------------|
|         | QSO              | $0.892 \pm 0.016$ | $0.716 \pm 0.025$ | $0.804 \pm 0.015$ | $0.820 \pm 0.014$ | $0.618 \pm 0.028$ |
|         | PSSM-composition | $0.865 \pm 0.019$ | $0.765 \pm 0.038$ | $0.815 \pm 0.022$ | $0.824 \pm 0.020$ | $0.633 \pm 0.042$ |
|         | S-FPSSM          | $0.897 \pm 0.017$ | $0.685 \pm 0.025$ | $0.791 \pm 0.016$ | $0.811 \pm 0.014$ | $0.595 \pm 0.030$ |
|         | RPM-PSSM         | $0.883 \pm 0.015$ | $0.710 \pm 0.042$ | $0.797 \pm 0.023$ | $0.813 \pm 0.019$ | $0.603 \pm 0.043$ |
| SVM     | AAC              | $0.875 \pm 0.015$ | $0.673 \pm 0.029$ | $0.774 \pm 0.018$ | $0.795 \pm 0.017$ | $0.560 \pm 0.034$ |
|         | DPC              | $0.846 \pm 0.022$ | $0.589 \pm 0.030$ | $0.717 \pm 0.019$ | $0.749 \pm 0.017$ | $0.449 \pm 0.036$ |
|         | DDE              | $0.843 \pm 0.017$ | $0.590 \pm 0.036$ | $0.716 \pm 0.019$ | $0.748 \pm 0.016$ | $0.447 \pm 0.036$ |
|         | PAAC             | $0.880 \pm 0.016$ | $0.666 \pm 0.030$ | $0.773 \pm 0.017$ | $0.795 \pm 0.016$ | $0.560 \pm 0.032$ |
|         | QSO              | $0.880 \pm 0.016$ | $0.630 \pm 0.031$ | $0.755 \pm 0.018$ | $0.782 \pm 0.016$ | $0.527 \pm 0.034$ |
|         | PSSM-composition | $0.844 \pm 0.027$ | $0.762 \pm 0.023$ | $0.803 \pm 0.018$ | $0.811 \pm 0.018$ | $0.608 \pm 0.037$ |
|         | S-FPSSM          | $0.857 \pm 0.023$ | $0.669 \pm 0.047$ | $0.763 \pm 0.024$ | $0.784 \pm 0.020$ | $0.537 \pm 0.044$ |
|         | RPM-PSSM         | $0.828 \pm 0.023$ | $0.737 \pm 0.028$ | $0.782 \pm 0.017$ | $0.792 \pm 0.016$ | $0.567 \pm 0.033$ |
| XGBoost | AAC              | $0.886 \pm 0.017$ | $0.742 \pm 0.025$ | $0.814 \pm 0.016$ | $0.826 \pm 0.016$ | $0.635 \pm 0.031$ |
|         | DPC              | $0.884 \pm 0.016$ | $0.744 \pm 0.023$ | $0.814 \pm 0.014$ | $0.826 \pm 0.014$ | $0.634 \pm 0.026$ |
|         | DDE              | $0.878 \pm 0.018$ | $0.760 \pm 0.021$ | $0.819 \pm 0.015$ | $0.829 \pm 0.016$ | $0.643 \pm 0.029$ |
|         | PAAC             | $0.878 \pm 0.017$ | $0.757 \pm 0.027$ | $0.817 \pm 0.018$ | $0.828 \pm 0.018$ | $0.639 \pm 0.035$ |
|         | QSO              | $0.886 \pm 0.015$ | $0.755 \pm 0.025$ | $0.820 \pm 0.015$ | $0.831 \pm 0.015$ | $0.647 \pm 0.029$ |
|         | PSSM-composition | $0.858 \pm 0.018$ | $0.851 \pm 0.019$ | $0.854 \pm 0.012$ | $0.855 \pm 0.013$ | $0.709 \pm 0.024$ |
|         | S-FPSSM          | $0.873 \pm 0.017$ | $0.825 \pm 0.025$ | $0.849 \pm 0.015$ | $0.852 \pm 0.015$ | $0.699 \pm 0.029$ |
|         | RPM-PSSM         | $0.869 \pm 0.015$ | $0.829 \pm 0.019$ | $0.849 \pm 0.013$ | $0.852 \pm 0.014$ | $0.698 \pm 0.025$ |
| MLP     | AAC              | $0.890 \pm 0.024$ | $0.683 \pm 0.039$ | $0.787 \pm 0.016$ | $0.807 \pm 0.015$ | $0.586 \pm 0.029$ |
|         | DPC              | $0.882 \pm 0.025$ | $0.705 \pm 0.038$ | $0.794 \pm 0.015$ | $0.810 \pm 0.014$ | $0.597 \pm 0.027$ |
|         | DDE              | $0.838 \pm 0.037$ | $0.758 \pm 0.058$ | $0.798 \pm 0.018$ | $0.806 \pm 0.014$ | $0.600 \pm 0.031$ |
|         | PAAC             | $0.890 \pm 0.027$ | $0.677 \pm 0.088$ | $0.784 \pm 0.038$ | $0.805 \pm 0.023$ | $0.581 \pm 0.063$ |
|         | QSO              | $0.878 \pm 0.027$ | $0.712 \pm 0.050$ | $0.795 \pm 0.020$ | $0.810 \pm 0.016$ | $0.599 \pm 0.033$ |
|         | PSSM-composition | $0.844 \pm 0.027$ | $0.843 \pm 0.039$ | $0.843 \pm 0.013$ | $0.843 \pm 0.012$ | $0.687 \pm 0.024$ |
|         | S-FPSSM          | $0.829 \pm 0.039$ | $0.825 \pm 0.047$ | $0.827 \pm 0.016$ | $0.827 \pm 0.016$ | $0.656 \pm 0.031$ |
|         | RPM-PSSM         | $0.852 \pm 0.029$ | $0.817 \pm 0.038$ | $0.835 \pm 0.011$ | $0.838 \pm 0.011$ | $0.671 \pm 0.021$ |
| CNN     | L100             | $0.744 \pm 0.109$ | $0.445 \pm 0.142$ | $0.594 \pm 0.025$ | $0.645 \pm 0.030$ | $0.204 \pm 0.039$ |
|         | L200             | $0.742 \pm 0.096$ | $0.502 \pm 0.117$ | $0.622 \pm 0.020$ | $0.661 \pm 0.030$ | $0.257 \pm 0.036$ |
|         | L300             | $0.705 \pm 0.103$ | $0.561 \pm 0.132$ | $0.634 \pm 0.022$ | $0.656 \pm 0.031$ | $0.276 \pm 0.041$ |
|         | L400             | $0.716 \pm 0.089$ | $0.565 \pm 0.120$ | $0.641 \pm 0.024$ | $0.664 \pm 0.029$ | $0.289 \pm 0.044$ |
|         | L500             | $0.728 \pm 0.091$ | $0.541 \pm 0.138$ | $0.634 \pm 0.030$ | $0.664 \pm 0.022$ | $0.279 \pm 0.054$ |
|         | L600             | $0.714 \pm 0.079$ | $0.563 \pm 0.110$ | $0.639 \pm 0.026$ | $0.663 \pm 0.026$ | $0.284 \pm 0.047$ |

|     |      |                  |                   |                   |                   |                   |                   |
|-----|------|------------------|-------------------|-------------------|-------------------|-------------------|-------------------|
|     |      | L700             | $0.729 \pm 0.082$ | $0.544 \pm 0.123$ | $0.636 \pm 0.031$ | $0.666 \pm 0.021$ | $0.283 \pm 0.049$ |
|     |      | L800             | $0.720 \pm 0.081$ | $0.560 \pm 0.107$ | $0.640 \pm 0.022$ | $0.665 \pm 0.024$ | $0.288 \pm 0.038$ |
|     |      | L900             | $0.728 \pm 0.092$ | $0.543 \pm 0.135$ | $0.636 \pm 0.030$ | $0.665 \pm 0.027$ | $0.281 \pm 0.056$ |
|     |      | L1000            | $0.729 \pm 0.097$ | $0.539 \pm 0.133$ | $0.635 \pm 0.027$ | $0.664 \pm 0.027$ | $0.280 \pm 0.042$ |
|     | LSTM | L100             | $0.773 \pm 0.100$ | $0.400 \pm 0.138$ | $0.587 \pm 0.025$ | $0.650 \pm 0.026$ | $0.191 \pm 0.038$ |
|     |      | L200             | $0.747 \pm 0.093$ | $0.479 \pm 0.129$ | $0.614 \pm 0.027$ | $0.657 \pm 0.028$ | $0.239 \pm 0.047$ |
|     |      | L300             | $0.768 \pm 0.140$ | $0.426 \pm 0.218$ | $0.598 \pm 0.046$ | $0.653 \pm 0.031$ | $0.216 \pm 0.076$ |
|     |      | L400             | $0.769 \pm 0.114$ | $0.441 \pm 0.183$ | $0.605 \pm 0.043$ | $0.659 \pm 0.025$ | $0.228 \pm 0.070$ |
|     |      | L500             | $0.671 \pm 0.113$ | $0.585 \pm 0.155$ | $0.627 \pm 0.031$ | $0.640 \pm 0.034$ | $0.263 \pm 0.052$ |
|     |      | L600             | $0.724 \pm 0.155$ | $0.494 \pm 0.268$ | $0.609 \pm 0.062$ | $0.646 \pm 0.030$ | $0.226 \pm 0.117$ |
|     |      | L700             | $0.729 \pm 0.167$ | $0.468 \pm 0.293$ | $0.598 \pm 0.067$ | $0.642 \pm 0.026$ | $0.203 \pm 0.132$ |
|     |      | L800             | $0.720 \pm 0.140$ | $0.505 \pm 0.236$ | $0.612 \pm 0.055$ | $0.647 \pm 0.026$ | $0.232 \pm 0.104$ |
|     |      | L900             | $0.721 \pm 0.181$ | $0.490 \pm 0.302$ | $0.605 \pm 0.065$ | $0.641 \pm 0.035$ | $0.220 \pm 0.126$ |
|     |      | L1000            | $0.736 \pm 0.145$ | $0.500 \pm 0.259$ | $0.618 \pm 0.061$ | $0.656 \pm 0.024$ | $0.244 \pm 0.118$ |
|     | DNN  | L100             | $0.793 \pm 0.055$ | $0.393 \pm 0.080$ | $0.593 \pm 0.018$ | $0.660 \pm 0.013$ | $0.204 \pm 0.032$ |
|     |      | L200             | $0.777 \pm 0.058$ | $0.465 \pm 0.067$ | $0.622 \pm 0.015$ | $0.672 \pm 0.022$ | $0.258 \pm 0.029$ |
|     |      | L300             | $0.773 \pm 0.061$ | $0.468 \pm 0.076$ | $0.621 \pm 0.021$ | $0.670 \pm 0.023$ | $0.255 \pm 0.040$ |
|     |      | L400             | $0.785 \pm 0.050$ | $0.482 \pm 0.086$ | $0.634 \pm 0.024$ | $0.682 \pm 0.016$ | $0.282 \pm 0.046$ |
|     |      | L500             | $0.776 \pm 0.057$ | $0.491 \pm 0.083$ | $0.633 \pm 0.022$ | $0.679 \pm 0.016$ | $0.281 \pm 0.040$ |
|     |      | L600             | $0.765 \pm 0.053$ | $0.509 \pm 0.079$ | $0.637 \pm 0.022$ | $0.678 \pm 0.017$ | $0.285 \pm 0.041$ |
|     |      | L700             | $0.768 \pm 0.050$ | $0.498 \pm 0.078$ | $0.633 \pm 0.021$ | $0.676 \pm 0.016$ | $0.277 \pm 0.041$ |
|     |      | L800             | $0.778 \pm 0.058$ | $0.485 \pm 0.074$ | $0.631 \pm 0.017$ | $0.678 \pm 0.017$ | $0.277 \pm 0.034$ |
|     |      | L900             | $0.775 \pm 0.053$ | $0.485 \pm 0.078$ | $0.630 \pm 0.018$ | $0.677 \pm 0.015$ | $0.274 \pm 0.034$ |
|     |      | L1000            | $0.777 \pm 0.081$ | $0.471 \pm 0.125$ | $0.624 \pm 0.029$ | $0.673 \pm 0.019$ | $0.264 \pm 0.045$ |
| 0.6 | RF   | AAC              | $0.743 \pm 0.023$ | $0.884 \pm 0.018$ | $0.813 \pm 0.013$ | $0.799 \pm 0.015$ | $0.633 \pm 0.025$ |
|     |      | DPC              | $0.476 \pm 0.082$ | $0.953 \pm 0.018$ | $0.714 \pm 0.037$ | $0.621 \pm 0.068$ | $0.489 \pm 0.057$ |
|     |      | DDE              | $0.573 \pm 0.094$ | $0.926 \pm 0.020$ | $0.749 \pm 0.042$ | $0.692 \pm 0.069$ | $0.535 \pm 0.068$ |
|     |      | PAAC             | $0.739 \pm 0.023$ | $0.886 \pm 0.017$ | $0.812 \pm 0.013$ | $0.797 \pm 0.015$ | $0.632 \pm 0.025$ |
|     |      | QSO              | $0.682 \pm 0.031$ | $0.906 \pm 0.019$ | $0.794 \pm 0.015$ | $0.767 \pm 0.019$ | $0.603 \pm 0.027$ |
|     |      | PSSM-composition | $0.635 \pm 0.035$ | $0.957 \pm 0.012$ | $0.796 \pm 0.017$ | $0.757 \pm 0.024$ | $0.626 \pm 0.028$ |
|     |      | S-FPSSM          | $0.635 \pm 0.025$ | $0.954 \pm 0.011$ | $0.795 \pm 0.013$ | $0.755 \pm 0.018$ | $0.622 \pm 0.023$ |
|     |      | RPM-PSSM         | $0.600 \pm 0.040$ | $0.963 \pm 0.011$ | $0.781 \pm 0.019$ | $0.732 \pm 0.030$ | $0.604 \pm 0.030$ |
|     | SVM  | AAC              | $0.734 \pm 0.023$ | $0.848 \pm 0.023$ | $0.791 \pm 0.016$ | $0.778 \pm 0.018$ | $0.586 \pm 0.032$ |
|     |      | DPC              | $0.605 \pm 0.022$ | $0.851 \pm 0.019$ | $0.728 \pm 0.016$ | $0.690 \pm 0.018$ | $0.471 \pm 0.030$ |

|         |                  |                   |                   |                   |                   |                   |
|---------|------------------|-------------------|-------------------|-------------------|-------------------|-------------------|
|         | DDE              | $0.614 \pm 0.019$ | $0.840 \pm 0.022$ | $0.727 \pm 0.014$ | $0.692 \pm 0.016$ | $0.466 \pm 0.029$ |
|         | PAAC             | $0.731 \pm 0.021$ | $0.847 \pm 0.022$ | $0.788 \pm 0.016$ | $0.775 \pm 0.018$ | $0.581 \pm 0.032$ |
|         | QSO              | $0.697 \pm 0.024$ | $0.860 \pm 0.021$ | $0.778 \pm 0.016$ | $0.758 \pm 0.017$ | $0.565 \pm 0.031$ |
|         | PSSM-composition | $0.728 \pm 0.026$ | $0.889 \pm 0.019$ | $0.809 \pm 0.015$ | $0.792 \pm 0.017$ | $0.626 \pm 0.030$ |
|         | S-FPSSM          | $0.687 \pm 0.080$ | $0.873 \pm 0.032$ | $0.780 \pm 0.031$ | $0.755 \pm 0.050$ | $0.572 \pm 0.051$ |
|         | RPM-PSSM         | $0.685 \pm 0.040$ | $0.891 \pm 0.020$ | $0.788 \pm 0.022$ | $0.764 \pm 0.028$ | $0.590 \pm 0.040$ |
| XGBoost | AAC              | $0.761 \pm 0.022$ | $0.870 \pm 0.019$ | $0.816 \pm 0.012$ | $0.805 \pm 0.014$ | $0.635 \pm 0.024$ |
|         | DPC              | $0.780 \pm 0.024$ | $0.860 \pm 0.021$ | $0.820 \pm 0.019$ | $0.812 \pm 0.021$ | $0.642 \pm 0.037$ |
|         | DDE              | $0.791 \pm 0.021$ | $0.862 \pm 0.017$ | $0.826 \pm 0.013$ | $0.820 \pm 0.015$ | $0.655 \pm 0.026$ |
|         | PAAC             | $0.768 \pm 0.016$ | $0.867 \pm 0.019$ | $0.818 \pm 0.011$ | $0.808 \pm 0.013$ | $0.638 \pm 0.023$ |
|         | QSO              | $0.763 \pm 0.025$ | $0.877 \pm 0.016$ | $0.820 \pm 0.013$ | $0.809 \pm 0.016$ | $0.644 \pm 0.025$ |
|         | PSSM-composition | $0.804 \pm 0.018$ | $0.912 \pm 0.017$ | $0.858 \pm 0.011$ | $0.850 \pm 0.012$ | $0.721 \pm 0.022$ |
|         | S-FPSSM          | $0.806 \pm 0.019$ | $0.908 \pm 0.017$ | $0.857 \pm 0.013$ | $0.849 \pm 0.014$ | $0.717 \pm 0.026$ |
|         | RPM-PSSM         | $0.798 \pm 0.020$ | $0.909 \pm 0.017$ | $0.854 \pm 0.013$ | $0.845 \pm 0.015$ | $0.712 \pm 0.027$ |
| MLP     | AAC              | $0.752 \pm 0.110$ | $0.803 \pm 0.051$ | $0.778 \pm 0.035$ | $0.767 \pm 0.071$ | $0.561 \pm 0.057$ |
|         | DPC              | $0.768 \pm 0.069$ | $0.806 \pm 0.047$ | $0.787 \pm 0.020$ | $0.781 \pm 0.032$ | $0.577 \pm 0.038$ |
|         | DDE              | $0.755 \pm 0.052$ | $0.832 \pm 0.043$ | $0.794 \pm 0.014$ | $0.785 \pm 0.022$ | $0.591 \pm 0.026$ |
|         | PAAC             | $0.730 \pm 0.126$ | $0.808 \pm 0.056$ | $0.770 \pm 0.041$ | $0.753 \pm 0.086$ | $0.546 \pm 0.066$ |
|         | QSO              | $0.758 \pm 0.090$ | $0.813 \pm 0.055$ | $0.786 \pm 0.023$ | $0.777 \pm 0.043$ | $0.577 \pm 0.040$ |
|         | PSSM-composition | $0.783 \pm 0.031$ | $0.907 \pm 0.024$ | $0.845 \pm 0.012$ | $0.834 \pm 0.015$ | $0.696 \pm 0.022$ |
|         | S-FPSSM          | $0.758 \pm 0.042$ | $0.905 \pm 0.027$ | $0.832 \pm 0.015$ | $0.818 \pm 0.021$ | $0.671 \pm 0.028$ |
|         | RPM-PSSM         | $0.787 \pm 0.042$ | $0.889 \pm 0.034$ | $0.838 \pm 0.011$ | $0.829 \pm 0.016$ | $0.681 \pm 0.020$ |
| CNN     | L100             | $0.362 \pm 0.152$ | $0.829 \pm 0.107$ | $0.596 \pm 0.027$ | $0.452 \pm 0.132$ | $0.223 \pm 0.044$ |
|         | L200             | $0.446 \pm 0.122$ | $0.808 \pm 0.090$ | $0.627 \pm 0.027$ | $0.535 \pm 0.090$ | $0.279 \pm 0.040$ |
|         | L300             | $0.493 \pm 0.125$ | $0.776 \pm 0.098$ | $0.635 \pm 0.024$ | $0.565 \pm 0.084$ | $0.289 \pm 0.037$ |
|         | L400             | $0.468 \pm 0.118$ | $0.807 \pm 0.088$ | $0.638 \pm 0.025$ | $0.554 \pm 0.084$ | $0.298 \pm 0.042$ |
|         | L500             | $0.473 \pm 0.127$ | $0.811 \pm 0.092$ | $0.642 \pm 0.026$ | $0.559 \pm 0.086$ | $0.310 \pm 0.040$ |
|         | L600             | $0.481 \pm 0.116$ | $0.804 \pm 0.090$ | $0.642 \pm 0.023$ | $0.565 \pm 0.076$ | $0.308 \pm 0.037$ |
|         | L700             | $0.486 \pm 0.105$ | $0.797 \pm 0.094$ | $0.642 \pm 0.021$ | $0.569 \pm 0.069$ | $0.306 \pm 0.038$ |
|         | L800             | $0.480 \pm 0.102$ | $0.807 \pm 0.086$ | $0.644 \pm 0.022$ | $0.567 \pm 0.068$ | $0.310 \pm 0.039$ |
|         | L900             | $0.442 \pm 0.112$ | $0.839 \pm 0.081$ | $0.641 \pm 0.025$ | $0.543 \pm 0.079$ | $0.313 \pm 0.036$ |
|         | L1000            | $0.475 \pm 0.118$ | $0.814 \pm 0.092$ | $0.645 \pm 0.021$ | $0.563 \pm 0.079$ | $0.316 \pm 0.033$ |
| LSTM    | L100             | $0.364 \pm 0.125$ | $0.836 \pm 0.098$ | $0.601 \pm 0.020$ | $0.464 \pm 0.098$ | $0.236 \pm 0.030$ |
|         | L200             | $0.412 \pm 0.083$ | $0.842 \pm 0.059$ | $0.627 \pm 0.022$ | $0.520 \pm 0.066$ | $0.284 \pm 0.038$ |

|     |     |                  |             |             |             |             |             |
|-----|-----|------------------|-------------|-------------|-------------|-------------|-------------|
|     |     | L300             | 0.422±0.136 | 0.830±0.097 | 0.626±0.031 | 0.518±0.099 | 0.284±0.049 |
|     |     | L400             | 0.438±0.104 | 0.808±0.082 | 0.623±0.028 | 0.530±0.075 | 0.269±0.050 |
|     |     | L500             | 0.439±0.103 | 0.815±0.076 | 0.627±0.026 | 0.533±0.076 | 0.279±0.040 |
|     |     | L600             | 0.444±0.104 | 0.827±0.060 | 0.636±0.030 | 0.542±0.082 | 0.296±0.050 |
|     |     | L700             | 0.415±0.127 | 0.827±0.086 | 0.621±0.038 | 0.511±0.105 | 0.271±0.067 |
|     |     | L800             | 0.437±0.122 | 0.825±0.089 | 0.631±0.027 | 0.532±0.087 | 0.290±0.046 |
|     |     | L900             | 0.436±0.108 | 0.833±0.073 | 0.635±0.030 | 0.536±0.087 | 0.298±0.054 |
|     |     | L1000            | 0.450±0.107 | 0.825±0.072 | 0.638±0.028 | 0.546±0.081 | 0.301±0.047 |
|     | DNN | L100             | 0.361±0.059 | 0.852±0.045 | 0.607±0.016 | 0.476±0.047 | 0.246±0.031 |
|     |     | L200             | 0.411±0.060 | 0.851±0.037 | 0.631±0.016 | 0.525±0.048 | 0.293±0.027 |
|     |     | L300             | 0.406±0.060 | 0.854±0.041 | 0.630±0.017 | 0.521±0.046 | 0.293±0.029 |
|     |     | L400             | 0.438±0.064 | 0.839±0.045 | 0.639±0.018 | 0.545±0.048 | 0.305±0.032 |
|     |     | L500             | 0.447±0.057 | 0.849±0.041 | 0.648±0.017 | 0.558±0.042 | 0.325±0.031 |
|     |     | L600             | 0.447±0.055 | 0.845±0.047 | 0.646±0.017 | 0.556±0.038 | 0.320±0.032 |
|     |     | L700             | 0.431±0.062 | 0.858±0.043 | 0.645±0.019 | 0.546±0.046 | 0.322±0.032 |
|     |     | L800             | 0.440±0.062 | 0.848±0.048 | 0.644±0.020 | 0.551±0.047 | 0.318±0.035 |
|     |     | L900             | 0.435±0.059 | 0.856±0.042 | 0.646±0.020 | 0.549±0.045 | 0.323±0.036 |
|     |     | L1000            | 0.422±0.059 | 0.863±0.040 | 0.643±0.017 | 0.539±0.045 | 0.320±0.030 |
| 0.7 | RF  | AAC              | 0.585±0.036 | 0.942±0.014 | 0.764±0.017 | 0.712±0.027 | 0.564±0.028 |
|     |     | DPC              | 0.204±0.054 | 0.992±0.006 | 0.598±0.027 | 0.334±0.073 | 0.317±0.049 |
|     |     | DDE              | 0.242±0.075 | 0.988±0.007 | 0.615±0.036 | 0.380±0.094 | 0.343±0.063 |
|     |     | PAAC             | 0.583±0.041 | 0.942±0.013 | 0.763±0.018 | 0.710±0.030 | 0.564±0.029 |
|     |     | QSO              | 0.480±0.046 | 0.964±0.013 | 0.722±0.021 | 0.632±0.039 | 0.507±0.033 |
|     |     | PSSM-composition | 0.502±0.041 | 0.980±0.009 | 0.741±0.021 | 0.659±0.035 | 0.549±0.031 |
|     |     | S-FPSSM          | 0.447±0.027 | 0.988±0.005 | 0.718±0.015 | 0.613±0.025 | 0.518±0.022 |
|     |     | RPM-PSSM         | 0.418±0.046 | 0.987±0.006 | 0.703±0.024 | 0.583±0.045 | 0.493±0.035 |
|     | SVM | AAC              | 0.599±0.024 | 0.918±0.019 | 0.758±0.013 | 0.712±0.019 | 0.546±0.027 |
|     |     | DPC              | 0.445±0.026 | 0.931±0.013 | 0.688±0.016 | 0.587±0.024 | 0.430±0.028 |
|     |     | DDE              | 0.453±0.027 | 0.921±0.017 | 0.687±0.016 | 0.591±0.026 | 0.423±0.031 |
|     |     | PAAC             | 0.593±0.028 | 0.921±0.019 | 0.757±0.014 | 0.709±0.021 | 0.544±0.027 |
|     |     | QSO              | 0.537±0.029 | 0.937±0.016 | 0.736±0.017 | 0.670±0.023 | 0.516±0.030 |
|     |     | PSSM-composition | 0.650±0.026 | 0.932±0.013 | 0.791±0.014 | 0.757±0.019 | 0.607±0.026 |
|     |     | S-FPSSM          | 0.533±0.063 | 0.943±0.017 | 0.738±0.028 | 0.668±0.051 | 0.522±0.044 |
|     |     | RPM-PSSM         | 0.595±0.037 | 0.937±0.016 | 0.766±0.020 | 0.718±0.029 | 0.567±0.035 |

|         |                  |                   |                   |                   |                   |                   |
|---------|------------------|-------------------|-------------------|-------------------|-------------------|-------------------|
| XGBoost | AAC              | $0.638 \pm 0.032$ | $0.925 \pm 0.016$ | $0.782 \pm 0.015$ | $0.745 \pm 0.021$ | $0.589 \pm 0.025$ |
|         | DPC              | $0.677 \pm 0.026$ | $0.916 \pm 0.014$ | $0.796 \pm 0.016$ | $0.768 \pm 0.020$ | $0.610 \pm 0.030$ |
|         | DDE              | $0.703 \pm 0.022$ | $0.908 \pm 0.015$ | $0.805 \pm 0.013$ | $0.783 \pm 0.015$ | $0.624 \pm 0.024$ |
|         | PAAC             | $0.674 \pm 0.022$ | $0.915 \pm 0.016$ | $0.794 \pm 0.013$ | $0.766 \pm 0.015$ | $0.607 \pm 0.024$ |
|         | QSO              | $0.657 \pm 0.047$ | $0.925 \pm 0.017$ | $0.791 \pm 0.020$ | $0.758 \pm 0.030$ | $0.605 \pm 0.032$ |
|         | PSSM-composition | $0.765 \pm 0.022$ | $0.935 \pm 0.016$ | $0.850 \pm 0.011$ | $0.836 \pm 0.012$ | $0.710 \pm 0.020$ |
|         | S-FPSSM          | $0.756 \pm 0.024$ | $0.936 \pm 0.015$ | $0.846 \pm 0.012$ | $0.831 \pm 0.015$ | $0.704 \pm 0.023$ |
|         | RPM-PSSM         | $0.745 \pm 0.018$ | $0.940 \pm 0.015$ | $0.843 \pm 0.011$ | $0.826 \pm 0.013$ | $0.699 \pm 0.021$ |
| MLP     | AAC              | $0.527 \pm 0.158$ | $0.897 \pm 0.049$ | $0.712 \pm 0.061$ | $0.630 \pm 0.151$ | $0.456 \pm 0.114$ |
|         | DPC              | $0.590 \pm 0.122$ | $0.886 \pm 0.050$ | $0.738 \pm 0.040$ | $0.685 \pm 0.080$ | $0.504 \pm 0.061$ |
|         | DDE              | $0.701 \pm 0.078$ | $0.859 \pm 0.047$ | $0.780 \pm 0.022$ | $0.759 \pm 0.041$ | $0.571 \pm 0.036$ |
|         | PAAC             | $0.498 \pm 0.182$ | $0.901 \pm 0.059$ | $0.700 \pm 0.066$ | $0.601 \pm 0.164$ | $0.439 \pm 0.107$ |
|         | QSO              | $0.583 \pm 0.141$ | $0.890 \pm 0.056$ | $0.737 \pm 0.047$ | $0.678 \pm 0.099$ | $0.503 \pm 0.071$ |
|         | PSSM-composition | $0.736 \pm 0.046$ | $0.926 \pm 0.025$ | $0.831 \pm 0.017$ | $0.813 \pm 0.023$ | $0.676 \pm 0.027$ |
|         | S-FPSSM          | $0.714 \pm 0.052$ | $0.927 \pm 0.023$ | $0.820 \pm 0.020$ | $0.798 \pm 0.030$ | $0.657 \pm 0.033$ |
|         | RPM-PSSM         | $0.739 \pm 0.059$ | $0.913 \pm 0.035$ | $0.826 \pm 0.018$ | $0.808 \pm 0.028$ | $0.664 \pm 0.029$ |
| CNN     | L100             | $0.232 \pm 0.172$ | $0.903 \pm 0.111$ | $0.567 \pm 0.034$ | $0.315 \pm 0.172$ | $0.194 \pm 0.051$ |
|         | L200             | $0.301 \pm 0.150$ | $0.885 \pm 0.096$ | $0.593 \pm 0.034$ | $0.403 \pm 0.142$ | $0.240 \pm 0.044$ |
|         | L300             | $0.381 \pm 0.159$ | $0.839 \pm 0.109$ | $0.610 \pm 0.033$ | $0.472 \pm 0.136$ | $0.260 \pm 0.041$ |
|         | L400             | $0.348 \pm 0.151$ | $0.870 \pm 0.099$ | $0.610 \pm 0.033$ | $0.451 \pm 0.133$ | $0.268 \pm 0.044$ |
|         | L500             | $0.352 \pm 0.161$ | $0.875 \pm 0.095$ | $0.614 \pm 0.037$ | $0.454 \pm 0.143$ | $0.277 \pm 0.050$ |
|         | L600             | $0.362 \pm 0.156$ | $0.866 \pm 0.098$ | $0.614 \pm 0.035$ | $0.463 \pm 0.131$ | $0.274 \pm 0.050$ |
|         | L700             | $0.366 \pm 0.143$ | $0.868 \pm 0.101$ | $0.618 \pm 0.031$ | $0.471 \pm 0.123$ | $0.282 \pm 0.048$ |
|         | L800             | $0.358 \pm 0.140$ | $0.877 \pm 0.092$ | $0.618 \pm 0.031$ | $0.467 \pm 0.121$ | $0.285 \pm 0.042$ |
|         | L900             | $0.305 \pm 0.138$ | $0.906 \pm 0.085$ | $0.606 \pm 0.036$ | $0.417 \pm 0.131$ | $0.273 \pm 0.051$ |
|         | L1000            | $0.348 \pm 0.153$ | $0.880 \pm 0.096$ | $0.614 \pm 0.034$ | $0.453 \pm 0.134$ | $0.280 \pm 0.044$ |
|         | LSTM             | L100              | $0.218 \pm 0.132$ | $0.919 \pm 0.084$ | $0.570 \pm 0.027$ | $0.317 \pm 0.134$ |
| L200    |                  | $0.281 \pm 0.083$ | $0.917 \pm 0.047$ | $0.599 \pm 0.023$ | $0.405 \pm 0.084$ | $0.260 \pm 0.037$ |
| L300    |                  | $0.293 \pm 0.148$ | $0.901 \pm 0.088$ | $0.597 \pm 0.039$ | $0.400 \pm 0.141$ | $0.251 \pm 0.062$ |
| L400    |                  | $0.302 \pm 0.118$ | $0.883 \pm 0.071$ | $0.593 \pm 0.033$ | $0.413 \pm 0.110$ | $0.232 \pm 0.054$ |
| L500    |                  | $0.325 \pm 0.111$ | $0.874 \pm 0.063$ | $0.599 \pm 0.033$ | $0.437 \pm 0.103$ | $0.241 \pm 0.049$ |
| L600    |                  | $0.315 \pm 0.119$ | $0.891 \pm 0.054$ | $0.603 \pm 0.039$ | $0.429 \pm 0.120$ | $0.253 \pm 0.066$ |
| L700    |                  | $0.295 \pm 0.120$ | $0.898 \pm 0.060$ | $0.596 \pm 0.039$ | $0.408 \pm 0.122$ | $0.242 \pm 0.070$ |
| L800    |                  | $0.304 \pm 0.140$ | $0.900 \pm 0.083$ | $0.602 \pm 0.035$ | $0.416 \pm 0.122$ | $0.260 \pm 0.056$ |



|     |       |             |             |             |             |             |
|-----|-------|-------------|-------------|-------------|-------------|-------------|
|     | L900  | 0.326±0.110 | 0.897±0.047 | 0.612±0.035 | 0.445±0.117 | 0.272±0.062 |
|     | L1000 | 0.337±0.130 | 0.889±0.069 | 0.613±0.036 | 0.450±0.128 | 0.275±0.056 |
| DNN | L100  | 0.206±0.046 | 0.937±0.024 | 0.571±0.017 | 0.321±0.055 | 0.211±0.028 |
|     | L200  | 0.267±0.054 | 0.930±0.022 | 0.599±0.019 | 0.397±0.060 | 0.264±0.034 |
|     | L300  | 0.259±0.048 | 0.938±0.023 | 0.599±0.018 | 0.390±0.055 | 0.269±0.032 |
|     | L400  | 0.271±0.050 | 0.937±0.025 | 0.604±0.015 | 0.404±0.055 | 0.280±0.029 |
|     | L500  | 0.297±0.057 | 0.931±0.022 | 0.614±0.020 | 0.432±0.060 | 0.295±0.034 |
|     | L600  | 0.307±0.052 | 0.925±0.029 | 0.616±0.016 | 0.442±0.052 | 0.297±0.027 |
|     | L700  | 0.296±0.059 | 0.929±0.026 | 0.613±0.020 | 0.430±0.062 | 0.292±0.033 |
|     | L800  | 0.302±0.057 | 0.924±0.028 | 0.613±0.020 | 0.435±0.060 | 0.290±0.035 |
|     | L900  | 0.293±0.059 | 0.930±0.024 | 0.612±0.020 | 0.427±0.063 | 0.290±0.032 |
|     | L1000 | 0.286±0.055 | 0.931±0.024 | 0.609±0.017 | 0.419±0.059 | 0.285±0.032 |

*Note:* Values are expressed as mean±standard deviation.

**Table S7.** Performance comparison of different algorithms to construct the final meta model on the 10-fold cross-validation test.

| Algorithms | Model        | SN                 | SP                 | ACC                | F-value            | MCC                |
|------------|--------------|--------------------|--------------------|--------------------|--------------------|--------------------|
| XGBoost    | ML model     | 0.836±0.021        | 0.916±0.017        | 0.876±0.013        | 0.871±0.015        | 0.755±0.027        |
|            | DL model     | 0.623±0.036        | 0.739±0.030        | 0.681±0.020        | 0.661±0.024        | 0.365±0.038        |
|            | Hybrid model | <b>0.837±0.023</b> | 0.918±0.015        | <b>0.878±0.014</b> | <b>0.872±0.016</b> | <b>0.758±0.027</b> |
| MLP        | ML model     | 0.767±0.107        | <b>0.946±0.019</b> | 0.856±0.053        | 0.837±0.094        | 0.726±0.088        |
|            | DL model     | 0.540±0.081        | 0.792±0.059        | 0.666±0.022        | 0.615±0.053        | 0.346±0.040        |
|            | Hybrid model | 0.772±0.067        | 0.947±0.021        | 0.860±0.026        | 0.844±0.043        | 0.732±0.044        |
| DNN        | ML model     | 0.804±0.021        | 0.908±0.016        | 0.856±0.013        | 0.848±0.015        | 0.716±0.025        |
|            | DL model     | 0.633±0.037        | 0.730±0.035        | 0.682±0.020        | 0.665±0.023        | 0.366±0.038        |
|            | Hybrid model | 0.762±0.033        | 0.864±0.025        | 0.813±0.015        | 0.802±0.018        | 0.630±0.028        |

*Note:* Values are expressed as mean±standard deviation. The best performance value is highlighted in bold.

**Table S8.** Performance comparison between models the meta model using the prediction label and the prediction score of baseline models based on the 10-fold cross validation test.

| <b>Feature</b>   | <b>SN</b>   | <b>SP</b>   | <b>ACC</b>  | <b>F-value</b> | <b>MCC</b>  |
|------------------|-------------|-------------|-------------|----------------|-------------|
| Prediction label | 0.837±0.023 | 0.918±0.015 | 0.878±0.014 | 0.872±0.016    | 0.758±0.027 |
| Prediction score | 0.837±0.022 | 0.906±0.019 | 0.872±0.015 | 0.867±0.016    | 0.745±0.030 |

**Table S9.** Detailed contributions of different baseline models to the performance of the ultimate meta XGBoost classifier.

| <b>Feature<sup>a</sup></b> | <b>Gain</b> | <b>Cover</b> | <b>Frequency</b> |
|----------------------------|-------------|--------------|------------------|
| MLP-S-FPSSM                | 0.334       | 0.048        | 0.016            |
| MLP-RPM-PSSM               | 0.113       | 0.031        | 0.014            |
| XGBOOST-S-FPSSM            | 0.101       | 0.035        | 0.016            |
| CNN-L100                   | 0.096       | 0.017        | 0.007            |
| XGBOOST-RPM-PSSM           | 0.067       | 0.063        | 0.029            |
| RF-DDE                     | 0.025       | 0.047        | 0.043            |
| SVM-S-FPSSM                | 0.025       | 0.039        | 0.029            |
| SVM-DDE                    | 0.022       | 0.049        | 0.053            |
| RF-AAC                     | 0.016       | 0.080        | 0.127            |
| SVM-PAAC                   | 0.014       | 0.024        | 0.039            |
| MLP-DDE                    | 0.011       | 0.023        | 0.015            |
| SVM-PSSM-composition       | 0.010       | 0.014        | 0.022            |
| XGBOOST-AAC                | 0.009       | 0.021        | 0.019            |
| RF-S-FPSSM                 | 0.007       | 0.015        | 0.016            |
| MLP-DPC                    | 0.005       | 0.020        | 0.013            |
| LSTM-L100                  | 0.005       | 0.011        | 0.015            |
| CNN-L600                   | 0.005       | 0.019        | 0.019            |
| SVM-AAC                    | 0.005       | 0.012        | 0.014            |
| SVM-QSOrder                | 0.005       | 0.012        | 0.015            |
| XGBOOST-PAAC               | 0.005       | 0.020        | 0.016            |
| CNN-L1000                  | 0.005       | 0.009        | 0.012            |
| SVM-RPM-PSSM               | 0.005       | 0.014        | 0.018            |
| CNN-L300                   | 0.004       | 0.017        | 0.024            |
| CNN-L400                   | 0.004       | 0.017        | 0.023            |
| LSTM-L700                  | 0.004       | 0.010        | 0.012            |
| LSTM-L1000                 | 0.004       | 0.017        | 0.020            |
| CNN-L800                   | 0.004       | 0.016        | 0.017            |
| LSTM-L800                  | 0.004       | 0.011        | 0.010            |
| RF-PAAC                    | 0.004       | 0.012        | 0.012            |
| CNN-L200                   | 0.004       | 0.014        | 0.021            |
| CNN-L900                   | 0.004       | 0.006        | 0.008            |
| XGBOOST-QSOrder            | 0.004       | 0.016        | 0.017            |
| SVM-DPC                    | 0.004       | 0.008        | 0.012            |
| MLP-QSOrder                | 0.003       | 0.012        | 0.008            |

|                          |       |       |       |
|--------------------------|-------|-------|-------|
| LSTM-L500                | 0.003 | 0.006 | 0.007 |
| LSTM-L600                | 0.003 | 0.013 | 0.013 |
| DNN-L700                 | 0.003 | 0.004 | 0.005 |
| LSTM-L200                | 0.003 | 0.010 | 0.011 |
| CNN-L700                 | 0.003 | 0.009 | 0.012 |
| RF-RPM-PSSM              | 0.003 | 0.011 | 0.010 |
| LSTM-L300                | 0.003 | 0.010 | 0.012 |
| LSTM-L400                | 0.003 | 0.012 | 0.013 |
| MLP-PAAC                 | 0.003 | 0.007 | 0.007 |
| RF-PSSM-composition      | 0.003 | 0.009 | 0.010 |
| XGBOOST-DPC              | 0.003 | 0.011 | 0.013 |
| CNN-L500                 | 0.003 | 0.012 | 0.015 |
| DNN-L900                 | 0.003 | 0.009 | 0.011 |
| DNN-L600                 | 0.003 | 0.007 | 0.009 |
| LSTM-L900                | 0.002 | 0.010 | 0.010 |
| DNN-L300                 | 0.002 | 0.009 | 0.011 |
| DNN-L500                 | 0.002 | 0.010 | 0.011 |
| DNN-L200                 | 0.002 | 0.009 | 0.011 |
| MLP-AAC                  | 0.002 | 0.007 | 0.008 |
| DNN-L100                 | 0.002 | 0.004 | 0.005 |
| DNN-L400                 | 0.002 | 0.005 | 0.006 |
| XGBOOST-DDE              | 0.002 | 0.008 | 0.009 |
| DNN-L800                 | 0.002 | 0.006 | 0.008 |
| DNN-L1000                | 0.001 | 0.003 | 0.004 |
| RF-DPC                   | 0.001 | 0.005 | 0.004 |
| MLP-PSSM-composition     | 0.001 | 0.006 | 0.005 |
| RF-QSOrder               | 0.001 | 0.004 | 0.005 |
| XGBOOST-PSSM-composition | 0.001 | 0.004 | 0.005 |

*Note:* Feature<sup>a</sup> are denoted as model\_feature. For example, MLP\_PSSM-composition means that the feature is composed of the predictive labels of the base model constructed by MLP with the PSSM-composition features.

**Table S10.** Performance comparison of baseline models for VF prediction on the independent test.

| Algorithm | Encoding         | SN           | SP           | ACC          | F-value      | MCC          |
|-----------|------------------|--------------|--------------|--------------|--------------|--------------|
| RF        | AAC              | 0.804        | 0.809        | 0.806        | 0.806        | 0.613        |
|           | DPC              | 0.774        | 0.814        | 0.794        | 0.790        | 0.589        |
|           | DDE              | 0.788        | 0.809        | 0.799        | 0.796        | 0.597        |
|           | PAAC             | 0.804        | 0.814        | 0.809        | 0.808        | 0.618        |
|           | QSO              | <b>0.806</b> | 0.832        | <b>0.819</b> | <b>0.816</b> | <b>0.637</b> |
|           | PSSM-composition | 0.726        | <b>0.872</b> | 0.799        | 0.783        | 0.604        |
|           | S-FPSSM          | 0.766        | 0.861        | 0.813        | 0.804        | 0.63         |
|           | RPM-PSSM         | 0.726        | 0.847        | 0.786        | 0.773        | 0.577        |
| SVM       | AAC              | <b>0.868</b> | 0.682        | 0.775        | 0.794        | 0.56         |
|           | DPC              | 0.776        | 0.717        | 0.747        | 0.754        | 0.494        |
|           | DDE              | 0.804        | 0.658        | 0.731        | 0.749        | 0.467        |
|           | PAAC             | 0.877        | 0.677        | 0.777        | 0.797        | 0.565        |
|           | QSO              | 0.826        | 0.743        | 0.785        | 0.793        | 0.571        |
|           | PSSM-composition | 0.694        | <b>0.891</b> | 0.793        | 0.770        | <b>0.597</b> |
|           | S-FPSSM          | 0.819        | 0.769        | 0.794        | <b>0.799</b> | 0.589        |
|           | RPM-PSSM         | 0.785        | 0.809        | <b>0.797</b> | 0.794        | 0.594        |
| XGBoost   | AAC              | 0.802        | 0.804        | 0.803        | 0.803        | 0.606        |
|           | DPC              | <b>0.814</b> | 0.802        | 0.808        | 0.809        | 0.616        |
|           | DDE              | 0.812        | 0.800        | 0.806        | 0.808        | 0.613        |
|           | PAAC             | 0.799        | 0.806        | 0.802        | 0.801        | 0.604        |
|           | QSO              | 0.806        | 0.818        | 0.812        | 0.810        | 0.623        |
|           | PSSM-composition | 0.799        | <b>0.832</b> | <b>0.815</b> | <b>0.812</b> | <b>0.631</b> |
|           | S-FPSSM          | 0.795        | 0.83         | 0.812        | 0.809        | 0.625        |
|           | RPM-PSSM         | 0.797        | 0.828        | 0.812        | 0.810        | 0.625        |
| MLP       | AAC              | 0.814        | 0.778        | 0.796        | 0.800        | 0.592        |
|           | DPC              | 0.816        | 0.785        | 0.800        | 0.803        | 0.601        |
|           | DDE              | 0.806        | 0.814        | 0.81         | 0.809        | 0.620        |
|           | PAAC             | <b>0.821</b> | 0.778        | 0.799        | 0.804        | 0.600        |
|           | QSO              | 0.809        | 0.792        | 0.800        | 0.802        | 0.601        |
|           | PSSM-composition | 0.767        | 0.851        | 0.809        | 0.801        | 0.62         |
|           | S-FPSSM          | 0.776        | <b>0.868</b> | <b>0.822</b> | <b>0.813</b> | <b>0.647</b> |
|           | RPM-PSSM         | 0.797        | 0.837        | 0.817        | <b>0.813</b> | 0.634        |
| CNN       | L100             | 0.571        | 0.740        | 0.655        | 0.624        | 0.315        |
|           | L200             | 0.616        | 0.764        | 0.69         | 0.665        | 0.384        |
|           | L300             | 0.635        | 0.764        | 0.700        | 0.679        | 0.403        |

|      |       |              |              |              |              |              |
|------|-------|--------------|--------------|--------------|--------------|--------------|
|      | L400  | 0.644        | 0.780        | 0.712        | 0.691        | 0.428        |
|      | L500  | <b>0.655</b> | 0.788        | 0.721        | 0.701        | 0.447        |
|      | L600  | 0.649        | <b>0.814</b> | <b>0.732</b> | <b>0.708</b> | <b>0.470</b> |
|      | L700  | 0.648        | 0.793        | 0.72         | 0.699        | 0.446        |
|      | L800  | 0.648        | 0.800        | 0.724        | 0.701        | 0.453        |
|      | L900  | 0.634        | 0.806        | 0.72         | 0.693        | 0.446        |
|      | L1000 | 0.639        | 0.799        | 0.719        | 0.694        | 0.443        |
| LSTM | L100  | 0.59         | 0.738        | 0.664        | 0.637        | 0.332        |
|      | L200  | 0.587        | 0.766        | 0.676        | 0.644        | 0.358        |
|      | L300  | 0.592        | 0.781        | 0.687        | 0.654        | 0.38         |
|      | L400  | <b>0.639</b> | 0.762        | 0.701        | 0.681        | 0.404        |
|      | L500  | 0.594        | 0.811        | 0.702        | 0.666        | 0.414        |
|      | L600  | 0.609        | 0.821        | 0.715        | 0.682        | 0.441        |
|      | L700  | 0.606        | 0.835        | 0.720        | 0.684        | 0.453        |
|      | L800  | 0.62         | 0.823        | <b>0.721</b> | 0.690        | 0.452        |
|      | L900  | 0.594        | <b>0.849</b> | <b>0.721</b> | 0.681        | <b>0.458</b> |
|      | L1000 | 0.623        | 0.819        | <b>0.721</b> | <b>0.691</b> | 0.451        |
| DNN  | L100  | 0.575        | 0.717        | 0.646        | 0.619        | 0.295        |
|      | L200  | 0.592        | 0.712        | 0.652        | 0.630        | 0.306        |
|      | L300  | 0.618        | 0.766        | 0.692        | 0.667        | 0.388        |
|      | L400  | 0.637        | 0.747        | 0.692        | 0.674        | 0.386        |
|      | L500  | 0.635        | 0.776        | 0.706        | 0.683        | 0.416        |
|      | L600  | <b>0.641</b> | 0.783        | <b>0.712</b> | <b>0.690</b> | 0.428        |
|      | L700  | 0.628        | <b>0.795</b> | <b>0.712</b> | 0.686        | <b>0.430</b> |
|      | L800  | 0.635        | 0.781        | 0.708        | 0.685        | 0.421        |
|      | L900  | 0.632        | 0.786        | 0.709        | 0.685        | 0.423        |
|      | L1000 | 0.630        | 0.793        | <b>0.712</b> | 0.686        | 0.429        |

*Note:* The best performance value for each metric across different encoding methods within each algorithm is highlighted in bold.

**Table S11.** Performance comparison of DeepVF trained based on VirulentPred’s training dataset and VirulentPred on different independent datasets.

| Testing dataset                  | Algorithm    | SN           | SP           | ACC          | F-value      | MCC          |
|----------------------------------|--------------|--------------|--------------|--------------|--------------|--------------|
| VirulentPred Ind-I <sup>a</sup>  | VirulentPred | <b>0.868</b> | -            | -            | -            | -            |
|                                  | DeepVF       | <b>0.868</b> | -            | -            | -            | -            |
| VirulentPred Ind-II <sup>b</sup> | VirulentPred | 0.787        | -            | -            | -            | -            |
|                                  | DeepVF       | <b>0.801</b> | -            | -            | -            | -            |
| The DeepVF independent dataset   | VirulentPred | 0.641        | 0.573        | 0.607        | 0.620        | 0.214        |
|                                  | DeepVF       | <b>0.668</b> | <b>0.623</b> | <b>0.646</b> | <b>0.654</b> | <b>0.292</b> |

*Note:* <sup>a</sup>VirulentPred Ind-I refers to the independent dataset I of VirulentPred, which contained 38 positive samples (Note that we removed the 22nd whose sequence length was less than 10 and the 25th sample whose sequence had illegal character X) and was downloaded from the VirulentPred webserver (no negative samples available). <sup>b</sup>VirulentPred Ind-II refers to the independent dataset II of VirulentPred, which contained 141 positive samples and was downloaded from the VirulentPred webserver (no negative samples available). The best performance value within each test case is highlighted in bold.



**Table S12.** Summary of the top 100 sequences predicted by DeepVF and the BLAST-based baseline predictor based on three proteomes.

| <b>Proteomes</b>                                              | <b>Number of Proteins<sup>a</sup></b> | <b>Overlap<sup>b</sup></b> | <b>DeepVF<sup>c</sup></b> | <b>BLAST<sup>d</sup></b> |
|---------------------------------------------------------------|---------------------------------------|----------------------------|---------------------------|--------------------------|
| <i>Escherichia coli</i> O157:H7                               | 4893 (19/3)                           | 12                         | 5                         | 0                        |
| <i>Streptococcus pneumoniae</i> (strain ATCC BAA-255 / R6)    | 1987 (1/2)                            | 14                         | 1                         | 1                        |
| <i>Mycobacterium tuberculosis</i> (strain ATCC 25618 / H37Rv) | 3616 (58/8)                           | 11                         | 3                         | 0                        |

*Note:* <sup>a</sup>Number of proteins within each proteome was counted after removing those sequences that have appeared in the training dataset. The values in the parenthesis represent positive/negative samples contained in the independent dataset/contained negative samples on independent dataset). <sup>b</sup>Overlap represents the number of predicted sequences that appeared in both top 100 ranking lists of DeepVF and the BLAST-based baseline predictor. <sup>c</sup>DeepVF represents the number of positive samples of the independent dataset that appeared in the top 100 ranking list of DeepVF. <sup>d</sup>BLAST represents the number of positive samples of the independent dataset that appeared in the top 100 ranking list of the BLAST-based baseline predictor.

**Table S13.** Detailed information of DeepVF and the existing toolkits for VF prediction from the user's viewpoint.

| <b>Toolkit</b> | <b>Web server reliability<sup>a</sup></b> | <b>Standalone toolkit</b> | <b>User learning document</b> | <b>Input data format</b> | <b>Number of sequences per submission</b> | <b>Computational cost<sup>b</sup></b> | <b>Output presentation</b> | <b>Output analysis</b>    | <b>Output download</b> |
|----------------|-------------------------------------------|---------------------------|-------------------------------|--------------------------|-------------------------------------------|---------------------------------------|----------------------------|---------------------------|------------------------|
| VirulentPred   | Sustained                                 | NO                        | NO                            | FASTA                    | <500                                      | ~ 11 minutes                          | Table                      | None                      | NO                     |
| MP3            | Intermittent <sup>a</sup>                 | YES                       | YES                           | FASTA                    | Unlimited                                 | < 5 seconds                           | None                       | None                      | YES                    |
| DeepVF         | Sustained                                 | NO                        | YES                           | FASTA/<br>Raw sequence   | <5000                                     | ~ 0.6 minutes                         | Table                      | Result search<br>and rank | YES                    |

<sup>a</sup>The MP3 server has relatively low reliability and could be intermittently accessed.

<sup>b</sup>The computational cost of a web server was evaluated by its executing time per protein sequence, which was obtained by averaging the computational time of 500 test sequences.

## 2. Supplementary Figures

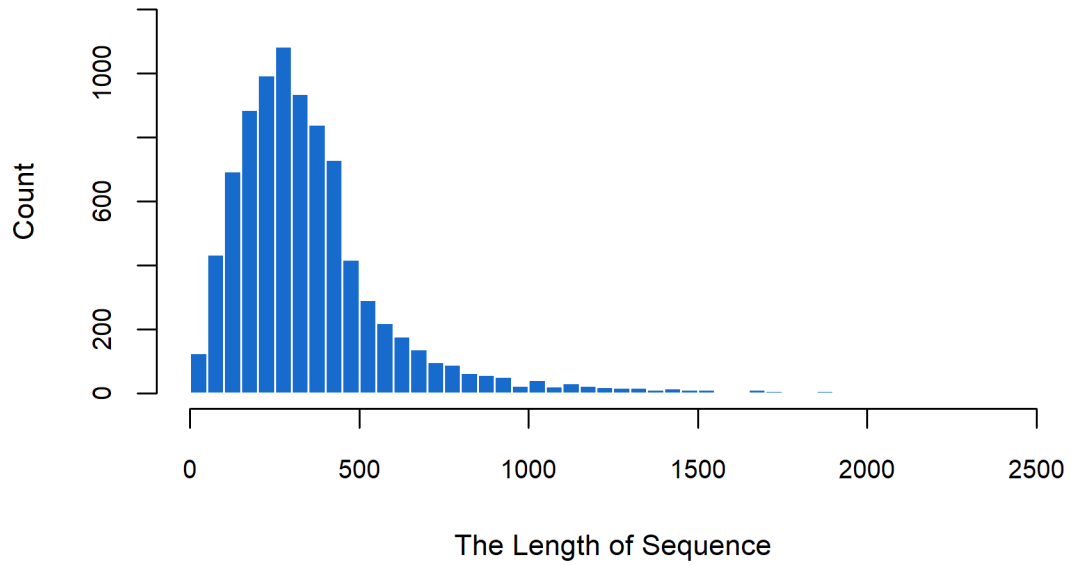

**Fig. S1.** Distribution of sequence lengths of proteins in the curated dataset.

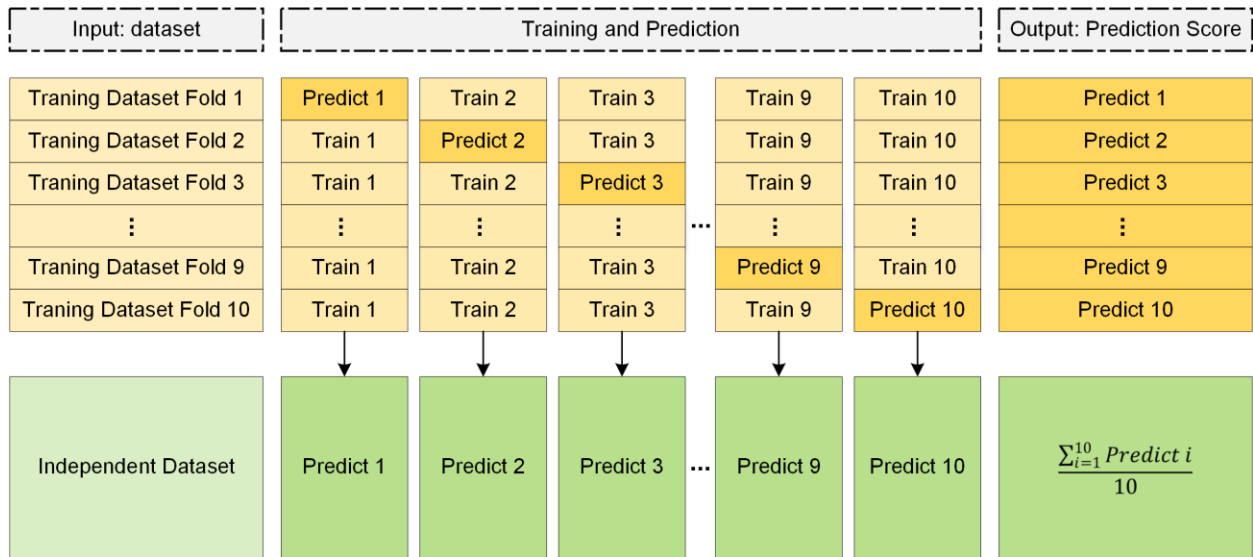

**Fig. S2.** The pipeline of constructing a baseline model based on the training dataset, and the prediction process on the independent dataset.

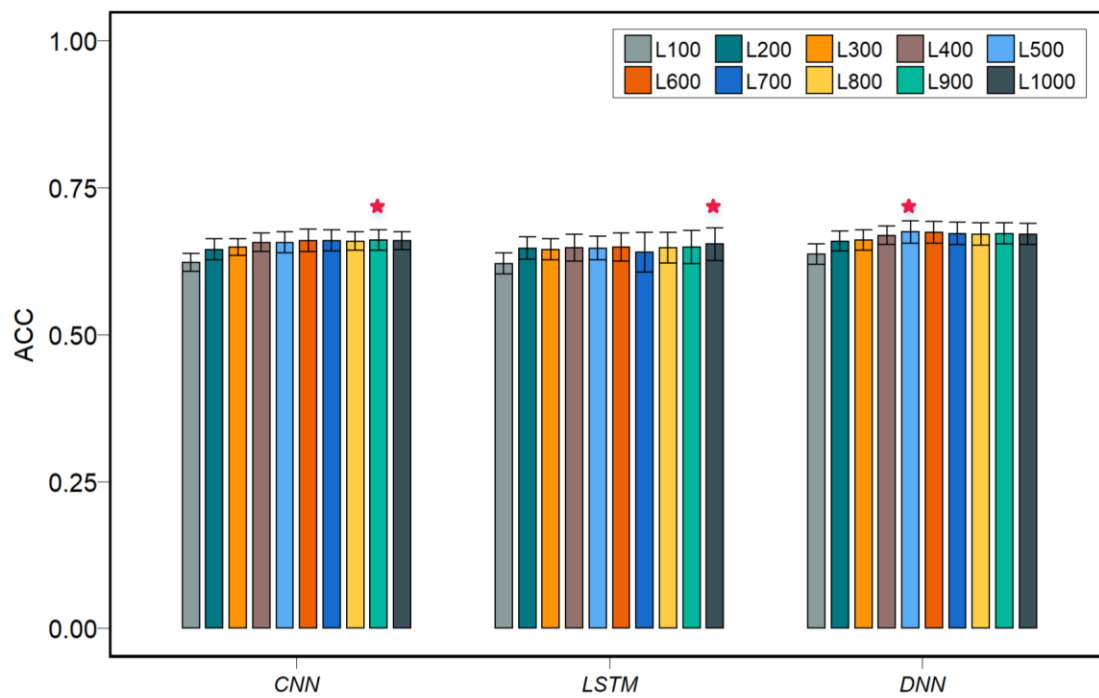

**Fig. S3.** Performance comparison of different DL models trained using different sizes of protein sequence segments based on the sequence-to-vector feature encoding method.

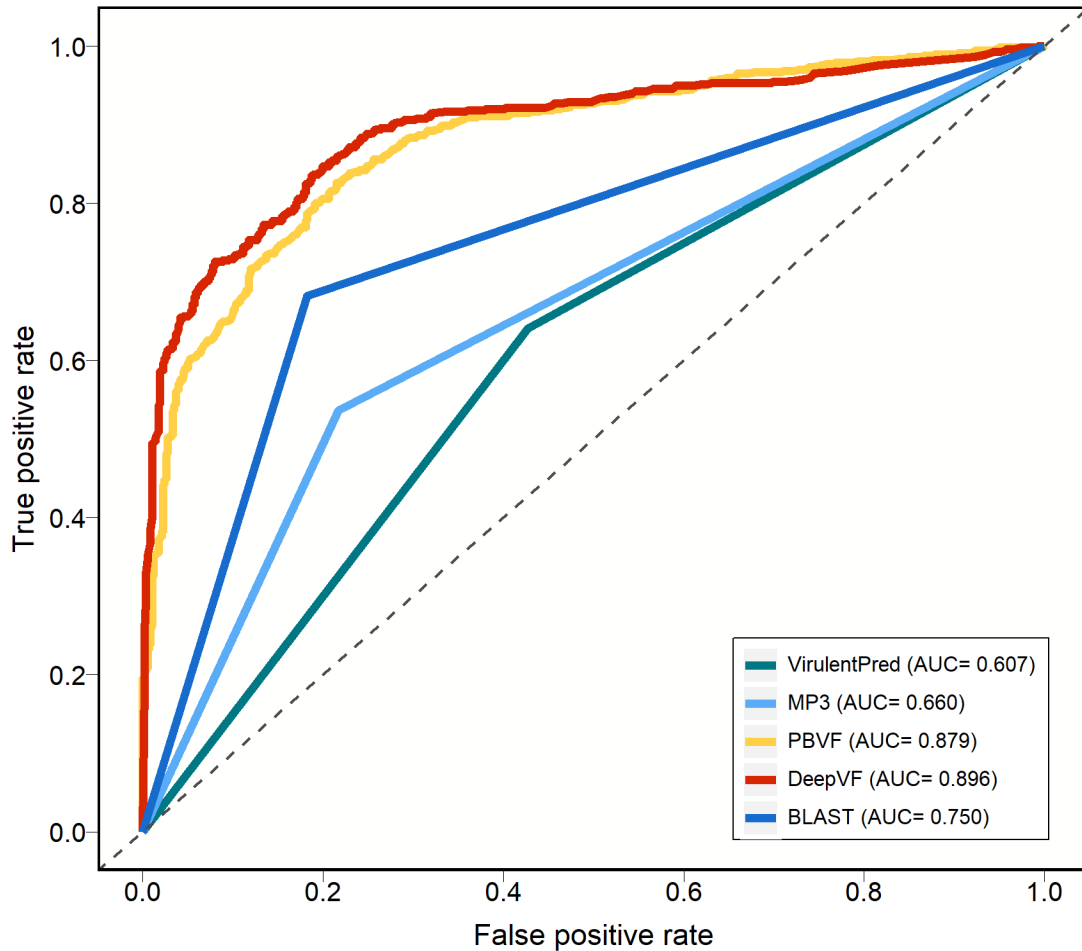

**Fig. S4.** ROC curves of DeepVF, the BLAST-based baseline predictor and three existing state-of-the-art methods for VF prediction on the independent test. Note that the range of predicting scores of VirulentPred and MP3 are different from that of DeepVF and PBVF, while the BLAST-based baseline predictor only provided a predictive label. Therefore, the ROC curves of those methods were generated by only using their predictive labels, which resulted in three broken lines in this figure.

### 3. Supplementary References

1. Sachdeva G, Kumar K, Jain P et al. SPAAN: a software program for prediction of adhesins and adhesin-like proteins using neural networks, *Bioinformatics* 2005;21:483-491.
2. Garg A, Gupta D. VirulentPred: a SVM based prediction method for virulent proteins in bacterial pathogens, *BMC bioinformatics* 2008;9:62.
3. Nanni L, Lumini A. An ensemble of support vector machines for predicting virulent proteins, *Expert Systems with Applications* 2009;36:7458-7462.
4. Tsai C-T, Huang W-L, Ho S-J et al. Virulent-GO: prediction of virulent proteins in bacterial pathogens utilizing gene ontology terms, *development* 2009;1:3.
5. Nanni L, Lumini A, Gupta D et al. Identifying bacterial virulent proteins by fusing a set of classifiers based on variants of Chou's pseudo amino acid composition and on evolutionary information, *IEEE/ACM Trans Comput Biol Bioinform* 2012;9:467-475.
6. Zheng LL, Li YX, Ding J et al. A comparison of computational methods for identifying virulence factors, *PLoS One* 2012;7:e42517.
7. Cui W, Chen L, Huang T et al. Computationally identifying virulence factors based on KEGG pathways, *Mol Biosyst* 2013;9:1447-1452.
8. Gupta A, Kapil R, Dhakan DB et al. MP3: a software tool for the prediction of pathogenic proteins in genomic and metagenomic data, *PLoS One* 2014;9:e93907.
9. Rentzsch R, Deneke C, Nitsche A et al. Predicting bacterial virulence factors – evaluation of machine learning and negative data strategies, *Brief Bioinform* 2019.
